# Supplementary material
Source: PubMed Central journal article supplement (PMC2658890)
Supplement: pr800198w-File003.pdf [file pr800198w-File003.pdf]

Supplementary Table 1: List of peptides identified by SILAC

|    | NCBI Accession number | Protein Description                                   | Peptide Sequence     | Peptide modifications | Protein Mass [Da] | h/w protein intensity ratio* | h/w protein StDev | h/w protein intensity ratio* | h/w protein StDev | Mass charge ratio | Measured mass | Mascot calculated mass [Da] | Uncalibrated mass error [Da] | Charge | Peptide Score | Left flanking AA | Right flanking AA | Sequence coverage | No. of peptides assigned to protein |
|----|-----------------------|-------------------------------------------------------|----------------------|-----------------------|-------------------|------------------------------|-------------------|------------------------------|-------------------|-------------------|---------------|-----------------------------|------------------------------|--------|---------------|------------------|-------------------|-------------------|-------------------------------------|
| 1  | gi 4506903            | Splicing factor, arginine/serine-rich 9               | VEFPR                | 1Arg10                | 25526             | 2.718                        | 1.188             | 9.337                        | 3.581             | 329.20            | 656.39        | 656.35                      | 0.034                        | 2      | 32            | R                | T                 | 19                | 5                                   |
|    |                       |                                                       | VEFPR                |                       |                   |                              |                   |                              |                   | 324.20            | 646.38        | 646.34                      | 0.037                        | 2      | 30            | R                | T                 |                   |                                     |
|    |                       |                                                       | VEFPR                | 1Arg6                 |                   |                              |                   |                              |                   | 327.21            | 652.40        | 652.36                      | 0.034                        | 2      | 30            | R                | T                 |                   |                                     |
|    |                       |                                                       | IYVGNLPTDVR          | 1Arg10                |                   |                              |                   |                              |                   | 628.89            | 1255.77       | 1255.68                     | 0.087                        | 2      | 38            | R                | E                 |                   |                                     |
|    |                       |                                                       | EKDLEDFYK            |                       |                   |                              |                   |                              |                   | 650.37            | 1298.72       | 1298.64                     | 0.077                        | 2      | 51            | R                | Y                 |                   |                                     |
|    |                       |                                                       | DLEDLFYK             |                       |                   |                              |                   |                              |                   | 521.80            | 1041.59       | 1041.50                     | 0.085                        | 2      | 41            | K                | Y                 |                   |                                     |
|    |                       |                                                       | DQVGMVEYLR           | 1Arg10                |                   |                              |                   |                              |                   | 574.82            | 1147.62       | 1147.56                     | 0.059                        | 2      | 41            | K                | K                 |                   |                                     |
| 2  | gi 5901926            | Cleavage and polyadenylation specific factor 5        | YIQQTKPLTLER         | 1Arg10                | 26211             | 2.673                        | 1.478             | 4.811                        | 3.070             | 500.64            | 1498.90       | 1498.84                     | 0.058                        | 3      | 39            | K                | T                 | 40                | 9                                   |
|    |                       |                                                       | TNLYPLNTYFTGTK       |                       |                   |                              |                   |                              |                   | 873.47            | 1744.92       | 1744.90                     | 0.014                        | 2      | 54            | R                | E                 |                   |                                     |
|    |                       |                                                       | SQTGWPR              | 1Arg10                |                   |                              |                   |                              |                   | 421.23            | 840.45        | 840.41                      | 0.034                        | 2      | 30            | R                | G                 |                   |                                     |
|    |                       |                                                       | LPGGELNPGDEVEGLK     |                       |                   |                              |                   |                              |                   | 876.94            | 1751.86       | 1751.86                     | -0.002                       | 2      | 73            | K                | R                 |                   |                                     |
|    |                       |                                                       | LMTIELGR             | 1Arg10                |                   |                              |                   |                              |                   | 471.79            | 941.56        | 941.52                      | 0.032                        | 2      | 53            | R                | O                 |                   |                                     |
|    |                       |                                                       | LMTIELGR             | 1Arg6                 |                   |                              |                   |                              |                   | 469.79            | 937.56        | 937.54                      | 0.027                        | 2      | 30            | R                | O                 |                   |                                     |
|    |                       |                                                       | LFLVQLQEK            |                       |                   |                              |                   |                              |                   | 559.35            | 1116.69       | 1116.65                     | 0.031                        | 2      | 53            | R                | A                 |                   |                                     |
|    |                       |                                                       | KFLVQLQEK            |                       |                   |                              |                   |                              |                   | 415.95            | 1244.82       | 1244.75                     | 0.070                        | 3      | 45            | K                | A                 |                   |                                     |
|    |                       |                                                       | GVTQFGNK             |                       |                   |                              |                   |                              |                   | 425.74            | 849.47        | 849.43                      | 0.038                        | 2      | 30            | R                | Y                 |                   |                                     |
|    |                       |                                                       | ALFAVPK              |                       |                   |                              |                   |                              |                   | 373.24            | 744.47        | 744.45                      | 0.017                        | 2      | 51            | K                | N                 |                   |                                     |
| 3  | gi 7706322            | Homeobox prox 1                                       | NHSSDWPK             |                       | 28068             | 1.131                        | 0.141             | 2.000                        | 0.301             | 361.87            | 1082.58       | 1082.51                     | 0.061                        | 3      | 33            | R                | F                 | 44                | 9                                   |
|    |                       |                                                       | NFVWLEDDK            |                       |                   |                              |                   |                              |                   | 646.35            | 1290.89       | 1290.85                     | 0.012                        | 2      | 37            | R                | I                 |                   |                                     |
|    |                       |                                                       | NAEPLNLDVNNPDFK      |                       |                   |                              |                   |                              |                   | 605.00            | 1811.97       | 1811.96                     | 0.030                        | 3      | 82            | K                | A                 |                   |                                     |
|    |                       |                                                       | LLHIEELR             | 1Arg10                |                   |                              |                   |                              |                   | 344.89            | 1031.64       | 1031.61                     | 0.055                        | 3      | 33            | R                | E                 |                   |                                     |
|    |                       |                                                       | INEAIVAVQAIADPK      |                       |                   |                              |                   |                              |                   | 833.00            | 1663.99       | 1663.91                     | 0.106                        | 2      | 79            | K                | T                 |                   |                                     |
|    |                       |                                                       | ILVQER               | 1Arg10                |                   |                              |                   |                              |                   | 384.26            | 766.50        | 766.41                      | 0.042                        | 2      | 31            | R                | L                 |                   |                                     |
|    |                       |                                                       | HILGFDTGDAVLNEAAQILR |                       |                   |                              |                   |                              |                   | 718.41            | 2152.22       | 2151.96                     | 0.030                        | 3      | 65            | K                | L                 |                   |                                     |
|    |                       |                                                       | EGLPVALDK            |                       |                   |                              |                   |                              |                   | 471.29            | 940.56        | 940.34                      | 0.031                        | 2      | 67            | K                | H                 |                   |                                     |
|    |                       |                                                       | AGVMALANLQIQR        | 1Arg6                 |                   |                              |                   |                              |                   | 507.32            | 1518.93       | 1518.89                     | 0.071                        | 3      | 39            | K                | H                 |                   |                                     |
|    |                       |                                                       | AGVMALANLQIQR        | 1Arg10                |                   |                              |                   |                              |                   | 762.45            | 1522.88       | 1522.86                     | 0.049                        | 2      | 73            | K                | H                 |                   |                                     |
| 4  | gi 13376429           | NEFA interacting nuclear protein                      | LTVKPIETK            |                       | 28895             | 1.463                        | 0.071             | 3.836                        | 0.947             | 343.56            | 1027.67       | 1027.63                     | 0.039                        | 3      | 30            | K                | N                 | 12                | 3                                   |
|    |                       |                                                       | IVSSIFR              | 1Arg10                |                   |                              |                   |                              |                   | 416.25            | 830.49        | 830.49                      | 0.005                        | 2      | 50            | K                | T                 |                   |                                     |
|    |                       |                                                       | GLDEDETNFLDEVSR      | 1Arg10                |                   |                              |                   |                              |                   | 874.88            | 1747.76       | 1747.78                     | -0.022                       | 2      | 67            | R                | Q                 |                   |                                     |
| 5  | gi 30410796           | Proteasome activator subunit 3 isoform 2              | TVSEEAASYLDQISR      | 1Arg10                | 30867             | 1.248                        | 0.173             | 2.554                        | 0.370             | 560.30            | 1677.89       | 1677.81                     | 0.082                        | 3      | 66            | R                | Y                 | 30                | 8                                   |
|    |                       |                                                       | TVSEEAASYLDQISR      |                       |                   |                              |                   |                              |                   | 558.99            | 1667.95       | 1667.80                     | 0.145                        | 3      | 36            | R                | Y                 |                   |                                     |
|    |                       |                                                       | TVSEEAASYLDQISR      | 1Arg6                 |                   |                              |                   |                              |                   | 559.00            | 1673.97       | 1673.82                     | 0.152                        | 3      | 30            | R                | Y                 |                   |                                     |
|    |                       |                                                       | SNQQLVDIEK           |                       |                   |                              |                   |                              |                   | 643.86            | 1285.71       | 1285.69                     | 0.022                        | 2      | 65            | K                | V                 |                   |                                     |
|    |                       |                                                       | MWVQLLIPR            | 1Met(ox) 1Arg10       |                   |                              |                   |                              |                   | 591.39            | 1180.76       | 1180.67                     | 0.092                        | 2      | 51            | K                | I                 |                   |                                     |
|    |                       |                                                       | MWVQLLIPR            | 1Arg10                |                   |                              |                   |                              |                   | 583.39            | 1164.77       | 1164.67                     | 0.098                        | 2      | 47            | K                | I                 |                   |                                     |
|    |                       |                                                       | LLIEK                |                       |                   |                              |                   |                              |                   | 308.24            | 614.47        | 614.40                      | 0.067                        | 2      | 30            | R                | C                 |                   |                                     |
|    |                       |                                                       | LLLEDSFLK            |                       |                   |                              |                   |                              |                   | 539.36            | 1076.70       | 1076.61                     | 0.087                        | 2      | 61            | K                | E                 |                   |                                     |
|    |                       |                                                       | LIISLR               | 1Arg10                |                   |                              |                   |                              |                   | 427.28            | 852.55        | 852.53                      | 0.022                        | 2      | 39            | R                | N                 |                   |                                     |
|    |                       |                                                       | LIISLR               |                       |                   |                              |                   |                              |                   | 422.30            | 842.59        | 842.52                      | 0.065                        | 2      | 49            | R                | N                 |                   |                                     |
|    |                       |                                                       | LIISLR               | 1Arg6                 |                   |                              |                   |                              |                   | 425.31            | 848.61        | 848.54                      | 0.066                        | 2      | 30            | R                | N                 |                   |                                     |
|    |                       |                                                       | KLLEDSFLK            |                       |                   |                              |                   |                              |                   | 402.63            | 1204.86       | 1204.71                     | 0.150                        | 3      | 54            | K                | E                 |                   |                                     |
|    |                       |                                                       | ITSEAEDEVANFFPK      |                       |                   |                              |                   |                              |                   | 840.99            | 1679.96       | 1679.84                     | 0.115                        | 2      | 89            | R                | K                 |                   |                                     |
| 6  | gi 16905517           | FUS interacting protein (serine/arginine-rich) 1      | YLRPNTSLFVR          | 2Arg10                | 31300             | 1.900                        | 0.000             | 5.140                        | 0.000             | 494.97            | 1481.89       | 1481.52                     | 0.03                         | 3      | 49            | R                | N                 | 5                 | 1                                   |
|    |                       |                                                       | YLRPNTSLFVR          |                       |                   |                              |                   |                              |                   | 498.31            | 1491.90       | 1491.61                     | 0.136                        | 3      | 30            | R                | N                 |                   |                                     |
| 7  | gi 14110414           | heterogeneous nuclear ribonucleoprotein D             | LDPITGR              | 1Arg10                | 32942             | 1.516                        | 0.000             | 4.332                        | 0.000             | 391.24            | 780.46        | 780.44                      | 0.050                        | 2      | 38            | K                | S                 | 12.5              | 4                                   |
|    |                       |                                                       | KYHNVLGSK            |                       |                   |                              |                   |                              |                   | 349.22            | 1044.63       | 1044.57                     | 0.020                        | 3      | 33            | K                | C                 |                   |                                     |
|    |                       |                                                       | IFVGGSLPDTPEEK       |                       |                   |                              |                   |                              |                   | 744.88            | 1487.75       | 1487.75                     | -0.005                       | 2      | 67            | K                | I                 |                   |                                     |
|    |                       |                                                       | DLKDYFSK             |                       |                   |                              |                   |                              |                   | 339.19            | 1014.55       | 1014.50                     | 0.039                        | 3      | 37            | K                | F                 |                   |                                     |
| 8  | gi 49472822           | Eukaryotic translation initiation factor 3, subunit 4 | VTNLSEDTIR           | 1Arg6                 | 35611             | 1.121                        | 0.000             | 2.210                        | 0.000             | 520.79            | 1039.57       | 1039.52                     | 0.120                        | 2      | 31            | R                | E                 | 3                 | 1                                   |
|    |                       |                                                       | VTNLSEDTIR           | 1Arg10                |                   |                              |                   |                              |                   | 522.79            | 1043.56       | 1043.51                     | 0.126                        | 2      | 63            | R                | E                 |                   |                                     |
| 9  | gi 55956919           | Heterogeneous nuclear ribonucleoprotein AB            | VLDQK                |                       | 35945             | 3.619                        | 0.000             | 8.010                        | 0.000             | 301.70            | 601.38        | 601.34                      | 0.035                        | 2      | 30            | K                | E                 | 24                | 8                                   |
|    |                       |                                                       | MFVGGSLWSDTSK        |                       |                   |                              |                   |                              |                   | 664.33            | 1326.64       | 1326.63                     | 0.016                        | 2      | 76            | K                | K                 |                   |                                     |
|    |                       |                                                       | KFHTVSGSK            |                       |                   |                              |                   |                              |                   | 495.79            | 989.56        | 989.53                      | 0.026                        | 2      | 57            | K                | C                 |                   |                                     |
|    |                       |                                                       | IFVGGSLNPEATEEK      |                       |                   |                              |                   |                              |                   | 752.40            | 1502.78       | 1502.76                     | 0.020                        | 2      | 83            | K                | I                 |                   |                                     |
|    |                       |                                                       | GFGLFLK              |                       |                   |                              |                   |                              |                   | 464.79            | 927.56        | 927.52                      | 0.041                        | 2      | 42            | R                | D                 |                   |                                     |
|    |                       |                                                       | EYVQQQYSGGGR         | 1Arg10                |                   |                              |                   |                              |                   | 755.36            | 1508.70       | 1508.69                     | 0.013                        | 2      | 56            | K                | G                 |                   |                                     |
|    |                       |                                                       | EYVQQQYSGGGR         | 1Arg6                 |                   |                              |                   |                              |                   | 753.36            | 1504.71       | 1504.70                     | 0.009                        | 2      | 45            | K                | G                 |                   |                                     |
|    |                       |                                                       | EYVQQQYSGGGR         |                       |                   |                              |                   |                              |                   | 750.34            | 1498.67       | 1498.68                     | -0.012                       | 2      | 32            | K                | G                 |                   |                                     |
|    |                       |                                                       | DYFTK                |                       |                   |                              |                   |                              |                   | 337.20            | 672.39        | 672.31                      | 0.079                        | 2      | 30            | K                | F                 |                   |                                     |
|    |                       |                                                       | DLKDYFTK             |                       |                   |                              |                   |                              |                   | 515.28            | 1028.54       | 1028.52                     | 0.020                        | 2      | 49            | K                | F                 |                   |                                     |
| 10 | gi 4502923            | Calponin 3                                            | HLVDPK               |                       | 36391             | 1.001                        | 0.000             | 3.389                        | 0.000             | 386.72            | 771.42        | 771.39                      | 0.024                        | 2      | 30            | R                | M                 | 9.1               | 3                                   |
|    |                       |                                                       | GPSYGLSAEVK          |                       |                   |                              |                   |                              |                   | 594.28            | 1186.55       | 1186.53                     | 0.026                        | 2      | 55            | K                | N                 |                   |                                     |
|    |                       |                                                       | GASQAGMLAPGTR        | 1Arg10                |                   |                              |                   |                              |                   | 613.81            | 1225.61       | 1225.61                     | 0.002                        | 2      | 71            | K                | R                 |                   |                                     |
|    |                       |                                                       | GASQAGMLAPGTR        | 1Met(ox) 1Arg10       |                   |                              |                   |                              |                   | 621.82            | 1241.62       | 1241.61                     | 0.012                        | 2      | 32            | K                | R                 |                   |                                     |
| 11 | gi 11034845           | Chromosome 20 Open reading frame 77                   | LTFYLANDVIQNSK       |                       | 36877             | 1.494                        | 0.312             | 1.953                        | 0.268             | 580.34            | 1737.99       | 1737.93                     | 0.063                        | 3      | 53            | K                | R                 | 19                | 5                                   |
|    |                       |                                                       | LLNIWQER             | 1Arg10                |                   |                              |                   |                              |                   | 541.31            | 1080.60       | 1080.60                     | 0.007                        | 2      | 43            | R                | S                 |                   |                                     |
|    |                       |                                                       | LAALEDR              | 1Arg10                |                   |                              |                   |                              |                   | 463.75            | 925.48        | 925.47                      | 0.003                        | 2      | 57            | R                | R                 |                   |                                     |
|    |                       |                                                       | IASLPEVDDVSLLEK      |                       |                   |                              |                   |                              |                   | 590.35            | 1768.01       | 1767.96                     | 0.053                        | 3      | 75            | K                | I                 |                   |                                     |
|    |                       |                                                       | EFESVLDVAFSHVAR      | 1Arg10                |                   |                              |                   |                              |                   | 572.65            | 1714.94       | 1714.86                     | 0.083                        | 3      | 55            | R                | E                 |                   |                                     |
| 12 | gi 14043072           | Heterogeneous nuclear ribonucleoprotein A2/B1         | TLETVPLER            | 1Arg10                | 37407             | 3.150                        | 1.430             | 10.230                       | 5.053             | 534.32            | 1066.62       | 1066.59                     | 0.030                        | 2      | 58            | K                | K                 | 53                | 16                                  |
|    |                       |                                                       | RGFQVTFDDHPVDK       | 1Arg10                |                   |                              |                   |                              |                   | 621.32            | 1860.94       | 1860.87                     | 0.071                        | 3      | 43            | K                | I                 |                   |                                     |
|    |                       |                                                       | QEMQEVQSSR           | 1Arg10                |                   |                              |                   |                              |                   | 607.79            | 1213.56       | 1213.53                     | 0.036                        | 2      | 59            | R                | S                 |                   |                                     |
|    |                       |                                                       | NYEQWQK              |                       |                   |                              |                   |                              |                   | 544.26            | 1086.51       | 1086.48                     | 0.032                        | 2      | 39            | R                | L                 |                   |                                     |
|    |                       |                                                       | LFVGGIKEDTTEHILR     | 1Arg10                |                   |                              |                   |                              |                   | 473.27            | 1889.05       | 1888.97                     | 0.086                        | 4      | 45            | K                | D                 |                   |                                     |
|    | </                    |                                                       |                      |                       |                   |                              |                   |                              |                   |                   |               |                             |                              |        |               |                  |                   |                   |                                     |

|        |            |                                            |                     |       |       |       |        |       |  |          |          |          |        |   |     |   |   |      |    |
|--------|------------|--------------------------------------------|---------------------|-------|-------|-------|--------|-------|--|----------|----------|----------|--------|---|-----|---|---|------|----|
|        |            | GGGGNFGPGGPNFR                             | 1Arg10              |       |       |       |        |       |  | 694.32   | 1386.63  | 1386.63  | -0.003 | 2 | 76  | R | G |      |    |
|        |            | GFGVTFDDHDPVKLQK                           |                     |       |       |       |        |       |  | 570.08   | 2276.28  | 2276.15  | 0.134  | 4 | 42  | R | Y |      |    |
|        |            | GFGVTFDDHDPVVK                             |                     |       |       |       |        |       |  | 848.38   | 1694.75  | 1694.76  | -0.010 | 2 | 89  | R | I |      |    |
|        |            | GFGVTFDDHDPVVK                             |                     |       |       |       |        |       |  | 848.38   | 1694.75  | 1694.76  | -0.005 | 2 | 85  | R | I |      |    |
|        |            | EESGKPGAHVTVK                              |                     |       |       |       |        |       |  | 669.86   | 1337.70  | 1337.69  | 0.005  | 2 | 49  | R | K |      |    |
|        |            | EDTEEHHLR                                  | 1Arg10              |       |       |       |        |       |  | 588.28   | 1174.55  | 1174.52  | 0.026  | 2 | 33  | K | D |      |    |
|        |            | EDTEEHHLR                                  | 1Arg10              |       |       |       |        |       |  | 588.29   | 1174.57  | 1174.52  | 0.045  | 2 | 55  | K | D |      |    |
|        |            | EDTEEHHLR                                  | 1Arg6               |       |       |       |        |       |  | 586.29   | 1170.56  | 1170.54  | 0.025  | 2 | 30  | K | D |      |    |
|        |            | DYFEYEGK                                   |                     |       |       |       |        |       |  | 525.74   | 1049.46  | 1049.43  | 0.028  | 2 | 33  | R | I |      |    |
| 13     | gj34740329 | Heterogeneous nuclear ribonucleoprotein A3 | 1Arg10              | 39571 | 1.799 | 0.432 | 6.086  | 2.518 |  | 667.61   | 1999.79  | 1999.76  | 0.038  | 3 | 45  | R | R | 22.4 | 7  |
|        |            | ISSGGYGGYGGSSGGSGYGR                       |                     |       |       |       |        |       |  | 431.31   | 860.60   | 860.55   | 0.055  | 2 | 60  | K | E |      |    |
|        |            | KIFVGGIK                                   |                     |       |       |       |        |       |  | 622.82   | 1243.62  | 1243.60  | 0.016  | 2 | 74  | K | Q |      |    |
|        |            | IETIEVMEDR                                 | 1Arg10              |       |       |       |        |       |  | 630.82   | 1259.62  | 1259.59  | 0.022  | 2 | 50  | K | Q |      |    |
|        |            | IETIEVMEDR                                 | 1Met(ox) 1Arg10     |       |       |       |        |       |  | 571.95   | 1712.83  | 1712.77  | 0.067  | 3 | 48  | R | I |      |    |
|        |            | GFAFVTFDDHDTVVK                            |                     |       |       |       |        |       |  | 589.78   | 1177.54  | 1177.51  | 0.030  | 2 | 66  | K | D |      |    |
|        |            | EDTEEYNLR                                  | 1Arg10              |       |       |       |        |       |  | 460.94   | 1379.81  | 1379.74  | 0.066  | 3 | 48  | R | K |      |    |
|        |            | EDSVKPSAHLTVK                              |                     |       |       |       |        |       |  | 525.24   | 1048.47  | 1048.49  | -0.019 | 2 | 33  | R | I |      |    |
|        |            | DYFEYEGK                                   |                     |       |       |       |        |       |  | 486.27   | 970.52   | 970.48   | 0.040  | 2 | 50  | R | V | 12   | 5  |
| 14     | gj13899354 | RNA binding motif protein 4B               | 1Arg10              | 40124 | 2.896 | 0.716 | 9.408  | 3.749 |  | 470.30   | 938.58   | 938.56   | 0.027  | 2 | 40  | K | E |      |    |
|        |            | SLFEQYQK                                   |                     |       |       |       |        |       |  | 554.78   | 1107.54  | 1107.52  | 0.022  | 2 | 67  | R | R |      |    |
|        |            | LFIGNLPR                                   |                     |       |       |       |        |       |  | 493.25   | 984.49   | 984.48   | 0.018  | 2 | 54  | R | S |      |    |
|        |            | GLDNTEFGQK                                 |                     |       |       |       |        |       |  | 492.26   | 982.51   | 982.50   | 0.017  | 2 | 61  | R | G |      |    |
|        |            | EATEQER                                    | 1Arg10              |       |       |       |        |       |  | 1236.15  | 2470.28  | 2470.13  | 0.145  | 2 | 81  | K | S | 14.5 | 3  |
|        |            | AEDAENR                                    | 1Arg10              |       |       |       |        |       |  | 1365.23  | 2728.44  | 2728.31  | 0.138  | 2 | 30  | R | E |      |    |
| 15     | gj21361320 | TRK-fused gene                             | 1Arg10              | 43421 | 1.112 | 0.000 | 2.353  | 0.000 |  | 451.26   | 900.51   | 900.47   | 0.043  | 2 | 30  | K | R |      |    |
|        |            | NVMSAFGLTDDQVSPSPAEADR                     |                     |       |       |       |        |       |  | 551.82   | 1101.62  | 1101.58  | 0.039  | 2 | 43  | R | V | 14.5 | 5  |
|        |            | LLDSLEPGEPEPSTNIPENDVDGR                   |                     |       |       |       |        |       |  | 921.46   | 1840.91  | 1840.88  | 0.025  | 2 | 85  | R | A |      |    |
|        |            | AQLGEDIR                                   |                     |       |       |       |        |       |  | 887.93   | 1773.84  | 1773.73  | 0.101  | 2 | 50  | K | L |      |    |
|        |            | VHIEIGPDGR                                 | 1Arg10              | 49198 | 1.815 | 0.319 | 5.591  | 0.915 |  | 355.22   | 708.43   | 708.38   | 0.044  | 2 | 31  | R | E |      |    |
|        |            | STGEAFVQFASQIEAK                           |                     |       |       |       |        |       |  | 669.69   | 2006.06  | 2005.98  | 0.082  | 3 | 30  | R | V |      |    |
|        |            | HTGPNSPDTANGFVFR                           | 1Arg10              |       |       |       |        |       |  | 935.94   | 1869.87  | 1869.77  | 0.106  | 2 | 57  | R | I | 29   | 10 |
|        |            | FVYTR                                      | 1Arg10              |       |       |       |        |       |  | 890.95   | 1779.89  | 1779.79  | 0.099  | 2 | 30  | R | I |      |    |
|        |            | ATENDIYNFSPNLNPR                           |                     |       |       |       |        |       |  | 507.03   | 1518.07  | 1517.93  | 0.138  | 3 | 83  | R | G |      |    |
| 17     | gj14165435 | Heterogeneous nuclear ribonucleoprotein K  | phospho (Y), 1Arg10 | 50944 | 1.762 | 0.155 | 3.732  | 0.241 |  | 858.04   | 1714.07  | 1713.98  | 0.095  | 2 | 32  | R | K |      |    |
|        |            | TDYNASVSPDSSGPER                           |                     |       |       |       |        |       |  | 351.25   | 700.48   | 700.45   | 0.028  | 2 | 35  | R | N |      |    |
|        |            | TDYNASVSPDSSGPER                           |                     |       |       |       |        |       |  | 863.87   | 2586.60  | 2586.58  | 0.219  | 3 | 50  | R | Q |      |    |
|        |            | LLIHSLAGGIQVK                              |                     |       |       |       |        |       |  | 670.92   | 1339.83  | 1339.80  | 0.030  | 2 | 87  | K | G |      |    |
|        |            | ILLSADIEITGELK                             |                     |       |       |       |        |       |  | 635.31   | 1268.61  | 1268.58  | 0.033  | 2 | 57  | K | I |      |    |
|        |            | ILLOS                                      |                     |       |       |       |        |       |  | 639.71   | 1916.11  | 1916.03  | 0.085  | 3 | 45  | R | D |      |    |
|        |            | IIITGTQDQIQNAQYLLQNSVK                     |                     |       |       |       |        |       |  | 504.26   | 1006.51  | 1006.44  | 0.067  | 2 | 38  | R | R |      |    |
|        |            | IILDISEPIK                                 |                     |       |       |       |        |       |  | 437.27   | 872.53   | 872.50   | 0.032  | 2 | 47  | K | G |      |    |
|        |            | IDPLEGSEDR                                 | 1Arg10              |       |       |       |        |       |  | 419.27   | 836.52   | 836.49   | 0.021  | 2 | 33  | R | G | 1    | 1  |
|        |            | GSYDGLGGPIITQVTIPK                         |                     |       |       |       |        |       |  | 424.25   | 846.48   | 846.43   | 0.031  | 2 | 30  | R | G |      |    |
|        |            | GGDLMAYDR                                  | 1Arg10              |       |       |       |        |       |  | 345.71   | 689.40   | 689.37   | 0.031  | 2 | 33  | K | R | 25   | 8  |
|        |            | DLAGSIQK                                   |                     |       |       |       |        |       |  | 749.88   | 1497.74  | 1497.66  | 0.083  | 2 | 50  | K | E |      |    |
| 18     | gj5031703  | RasGAP SH3-domain binding protein          | 1Arg10              | 52164 | 1.123 | 0.000 | 2.215  | 0.000 |  | 1717.89  | 1433.76  | 1433.68  | 0.075  | 2 | 31  | K | E |      |    |
|        |            | INIPQR                                     | 1Arg10              |       |       |       |        |       |  | 1195.95  | 3584.82  | 3584.82  | 0.200  | 3 | 34  | R | Q |      |    |
|        |            | VSFATR                                     | 1Arg10              | 53394 | 2.179 | 0.219 | 5.007  | 0.866 |  | 710.61   | 1419.65  | 1419.65  | 0.013  | 2 | 76  | K | A |      |    |
|        |            | TGQPMNLYTDR                                | 1Arg10              |       |       |       |        |       |  | 446.29   | 890.56   | 890.45   | 0.108  | 2 | 42  | K | V |      |    |
|        |            | TGQPMNLYTDR                                | 1Met(ox) 1Arg10     |       |       |       |        |       |  | 755.03   | 2262.08  | 2261.97  | 0.101  | 3 | 60  | K | R |      |    |
|        |            | HDSECDNSDNTIFVQGLGENVTIESVADYFK            |                     |       |       |       |        |       |  | 1127.06  | 2252.10  | 2251.97  | 0.131  | 2 | 46  | K | R |      |    |
|        |            | GEATVSDPDPBAK                              |                     |       |       |       |        |       |  | 632.33   | 1893.97  | 1893.93  | 0.048  | 3 | 32  | K | V |      |    |
|        |            | EFSGNPIK                                   |                     |       |       |       |        |       |  | 511.77   | 1021.52  | 1021.49  | 0.032  | 2 | 73  | K | E |      |    |
|        |            | APKPDGPGGGPGGSHMGGNYGDDR                   | 1Arg10              |       |       |       |        |       |  | 470.77   | 939.53   | 939.45   | 0.078  | 2 | 38  | R | K | 12.5 | 6  |
|        |            | APKPDGPGGGPGGSHMGGNYGDDR                   |                     |       |       |       |        |       |  | 525.34   | 1048.66  | 1048.59  | 0.066  | 2 | 58  | R | G |      |    |
|        |            | AAIDVFDGKFEFSGNPIK                         |                     |       |       |       |        |       |  | 861.96   | 1721.91  | 1721.82  | 0.084  | 2 | 105 | K | A |      |    |
|        |            | LAIDVFDGK                                  |                     |       |       |       |        |       |  | 351.74   | 701.47   | 701.41   | 0.063  | 2 | 30  | R | E |      |    |
|        |            | TEIDLSIK                                   | 1Arg10              | 59797 | 4.914 | 2.761 | 29.801 | 9.129 |  | 499.28   | 996.54   | 996.51   | 0.029  | 2 | 50  | R | G |      |    |
|        |            | LLNAENR                                    | 1Arg10              |       |       |       |        |       |  | 698.43   | 2092.27  | 2092.06  | 0.210  | 3 | 37  | R | T |      |    |
|        |            | LFGGFNSSDVTSPQR                            | 1Arg10              |       |       |       |        |       |  | 872.99   | 1743.97  | 1743.87  | 0.104  | 2 | 55  | K | L | 17.5 | 7  |
|        |            | GTLFVR                                     | 1Arg10              |       |       |       |        |       |  | 600.81   | 1199.61  | 1199.55  | 0.066  | 2 | 73  | R | E |      |    |
|        |            | EVLDQVER                                   | 1Arg10              |       |       |       |        |       |  | 977.99   | 1953.96  | 1953.84  | 0.121  | 2 | 43  | K | T |      |    |
|        |            | AGPLAGGVITTFVALYDYESR                      | 1Arg6               |       |       |       |        |       |  | 1083.06  | 2164.10  | 2163.97  | 0.136  | 2 | 86  | R | E |      |    |
|        |            | AGPLAGGVITTFVALYDYESR                      | 1Arg6               |       |       |       |        |       |  | 431.74   | 861.46   | 861.40   | 0.052  | 2 | 44  | K | V |      |    |
|        |            | TOTPPVSPAPQTEER                            | 1Arg10              | 61549 | 2.481 | 1.485 | 4.892  | 2.642 |  | 453.76   | 905.51   | 905.46   | 0.050  | 2 | 37  | R | E |      |    |
|        |            | QDSAAVFDYK                                 |                     |       |       |       |        |       |  | 675.36   | 2023.06  | 2022.97  | 0.090  | 3 | 35  | R | L |      |    |
|        |            | NASTFEDVTQVSSAYOK                          | phospho (Y)         |       |       |       |        |       |  | 1016.040 | 2030.070 | 2029.950 | 0.007  | 2 | 45  | K | T | 3    | 1  |
|        |            | GPVSGTEPEPVYSMEAADYR                       | 1Arg10              |       |       |       |        |       |  | 351.25   | 700.49   | 700.45   | 0.038  | 2 | 62  | K | G | 9.7  | 8  |
|        |            | FGVMDR                                     | 1Arg10              |       |       |       |        |       |  | 380.23   | 758.45   | 758.42   | 0.029  | 2 | 42  | R | I |      |    |
|        |            | ANFENLAK                                   |                     |       |       |       |        |       |  | 479.30   | 956.59   | 956.55   | 0.038  | 2 | 50  | R | G |      |    |
|        |            | AKTQTPPVSPAPQTEER                          | 1Arg10              |       |       |       |        |       |  | 1027.48  | 2052.96  | 2052.91  | 0.128  | 2 | 65  | K | R |      |    |
| 22,000 | gj40254978 | FIP1-like 1                                | phospho (Y)         | 66535 | 0.000 | 0.000 | 0.000  | 0.000 |  | 539.33   | 1076.64  | 1076.59  | 0.065  | 2 | 56  | R | C |      |    |
|        |            | TGLIIGK                                    |                     |       |       |       |        |       |  | 579.82   | 1157.57  | 1157.57  | 0.058  | 2 | 48  | R | Q |      |    |
|        |            | OLIEEK                                     |                     |       |       |       |        |       |  | 506.80   | 1011.59  | 1011.57  | 0.020  | 2 | 34  | K | D |      |    |
|        |            | LLDQIVEK                                   |                     |       |       |       |        |       |  | 494.76   | 987.51   | 987.43   | 0.078  | 2 | 35  | K | K |      |    |
|        |            | IGDGDATSLNSNDYGYGGQK                       | phospho (Y)         |       |       |       |        |       |  | 329.24   | 656.47   | 656.42   | 0.044  | 2 | 55  | K | G |      |    |
|        |            | IAQITGPPDR                                 | 1Arg10              |       |       |       |        |       |  | 825.06   | 2472.16  | 2472.03  | 0.135  | 3 | 55  | R | S | 13.1 | 4  |
|        |            | GTPOQIDYAR                                 | 1Arg10              |       |       |       |        |       |  | 862.     |          |          |        |   |     |   |   |      |    |

|    |             |                                               |                                                                |                 |        |       |       |        |       |          |           |           |           |   |    |   |   |      |     |
|----|-------------|-----------------------------------------------|----------------------------------------------------------------|-----------------|--------|-------|-------|--------|-------|----------|-----------|-----------|-----------|---|----|---|---|------|-----|
| 26 | gj 5031579  | A-kinase anchor protein 8                     | AGLVIGK<br>SNPGTFMR                                            | 1Arg10          | 76061  | 2.088 | 0.000 | 5.509  | 0.000 | 329.24   | 656.47    | 656.42    | 0.044     | 2 | 55 | K | G |      |     |
|    |             |                                               | LAAEQFK                                                        |                 |        |       |       |        |       | 460.25   | 918.49    | 918.43    | 0.060     | 2 | 32 | R | S | 2.1  | 2   |
| 27 | gj 4826998  | Splicing factor proline/glutamine rich        | NLSPYVSNLEELLEAFSQFGPIER<br>FGQGGAGPVGGGGPR<br>FGQGGAGPVGGGGPR | 1Arg10          | 76102  | 1.618 | 0.425 | 3.073  | 0.980 | 403.75   | 905.48    | 805.43    | 0.048     | 2 | 32 | R | K |      | 6.5 |
|    |             |                                               | AVVIVDDR                                                       | 1Arg10          |        |       |       |        |       | 676.38   | 1350.74   | 1350.67   | 0.078     | 2 | 35 | R | G |      |     |
|    |             |                                               | TASGVADEDALTLEEEQQQR                                           | 1Arg10          | 78720  | 1.32  | 0.000 | 3.715  | 0.000 | 671.38   | 1340.74   | 1340.71   | 0.106     | 2 | 36 | R | G |      |     |
| 28 | gj 38044290 | zinc finger, CCHC domain containing 8         | SVTYDLISK                                                      | 1Arg10          |        |       |       |        |       | 448.78   | 895.54    | 895.50    | 0.039     | 2 | 32 | R | G |      |     |
|    |             |                                               | VALSEPOFER                                                     | 1Arg10          | 90194  | 1.994 | 0.000 | 5.396  | 0.000 | 1157.62  | 2313.22   | 2313.80   | 0.038     | 2 | 47 | R | R | 4.1  | 2   |
|    |             |                                               | EVAFNNFLTDAK                                                   | 1Arg10          |        |       |       |        |       | 456.76   | 911.51    | 911.49    | 0.021     | 2 | 39 | K | L |      |     |
| 29 | gj 33383233 | Arsenate resistance protein ARS2 isoform b    | VGEFVLSSEER<br>VGEFVLSSEER                                     | 1Arg10          | 90194  | 1.994 | 0.000 | 5.396  | 0.000 | 568.33   | 1134.65   | 1134.59   | 0.059     | 2 | 37 | R | R | 2.9  | 2   |
|    |             |                                               | SSLGQASASETEDTVSVSK                                            | 1Arg10          | 100165 | 1.405 | 0.000 | 2.996  | 0.000 | 758.42   | 1514.82   | 1514.74   | 0.049     | 2 | 58 | R | L | 6.4  | 3   |
|    |             |                                               | LAQQQAALLMQQEER                                                | 1Met(ox) 1Arg10 |        |       |       |        |       | 662.872  | 1323.7398 | 1323.6545 | 0.0853746 | 2 | 69 | R | L |      |     |
|    |             |                                               | GSSYGVSTFESYK                                                  |                 |        |       |       |        |       | 657.8584 | 1313.7022 | 1313.6462 | 0.0560746 | 2 | 36 | R | L |      |     |
| 31 | gj 20127479 | RNA binding motif protein 10                  | GLOLSHGVQAR                                                    | 1Arg10          | 103469 | 2.305 | 0.212 | 7.188  | 0.573 | 971.0134 | 1940.0122 | 1939.8858 | 0.1264746 | 2 | 58 | R | K |      |     |
|    |             |                                               | GDPTGAGPEASLEPGADSVSMQAFSR                                     | 1Arg10          |        |       |       |        |       | 892.0159 | 1782.0172 | 1781.8969 | 0.1203746 | 2 | 30 | K | A |      |     |
|    |             |                                               | ELSQGLLPLPOPYQAQGVLSAQLSQGSEPSSENANDTII                        | 1Arg10          |        |       |       |        |       | 683.36   | 1364.70   | 1364.61   | 0.090     | 2 | 31 | R | E | 14   | 5   |
|    |             |                                               | AOPGAAPGYQGSAAESSQGTAAANSQSYTIMSPAVLK                          | 1Arg10          |        |       |       |        |       | 595.85   | 1189.69   | 1189.62   | 0.066     | 2 | 34 | R | E |      |     |
|    |             |                                               | VFLDDR                                                         | 1Arg10          | 106122 | 2.200 | 0.000 | 5.500  | 0.000 | 1272.66  | 2543.31   | 2543.15   | 0.164     | 2 | 40 | K | A |      |     |
|    |             |                                               | SIFDHIK                                                        |                 |        |       |       |        |       | 1108.38  | 4429.49   | 4429.26   | 0.229     | 4 | 63 | R | N |      |     |
|    |             |                                               | LLASTLVHSVK                                                    |                 |        |       |       |        |       | 1256.69  | 3767.04   | 3766.81   | 0.227     | 3 | 35 | R | S |      |     |
|    |             |                                               | DTFEHDPSEIDFNK                                                 |                 |        |       |       |        |       | 386.76   | 771.51    | 771.45    | 0.043     | 2 | 35 | R | G | 4.5  | 4   |
|    |             |                                               | SPSELFQAQHVITIVHHVK                                            |                 | 108789 | 1.209 | 0.000 | 5.143  | 0.000 | 430.26   | 858.51    | 858.46    | 0.120     | 2 | 30 | R | L |      |     |
| 33 | gj 4827040  | Thyroid hormone receptor associated protein 3 | SIFHQIQAQSQR                                                   | 1Arg10          |        |       |       |        |       | 389.93   | 1166.77   | 1166.70   | 0.020     | 3 | 51 | R | K |      |     |
|    |             |                                               | LDIERRK                                                        | 2Arg6           |        |       |       |        |       | 637.31   | 1908.90   | 1908.80   | 0.020     | 3 | 30 | K | S |      |     |
|    |             |                                               | GSFSDTGLQDGK                                                   |                 |        |       |       |        |       | 511.31   | 2041.19   | 2041.11   | 0.037     | 3 | 41 | R | E | 5    | 4   |
|    |             |                                               | TLEPOELAR                                                      | 1Arg10          | 111851 | 0.818 | 0.000 | 2.160  | 0.000 | 513.96   | 1538.86   | 1538.81   | 0.120     | 3 | 31 | R | S |      |     |
|    |             |                                               | ISLAPTDVK                                                      |                 |        |       |       |        |       | 471.33   | 940.65    | 940.62    | 0.090     | 2 | 33 | R | K |      |     |
|    |             |                                               | FNEENYGVK                                                      |                 |        |       |       |        |       | 570.80   | 1139.59   | 1139.51   | 0.081     | 2 | 56 | K | M |      |     |
| 34 | gj 27262645 | Ataxin 2 related protein                      | DGSLASNPYSGDLTK                                                | 1Arg10          |        |       |       |        |       | 533.83   | 1085.66   | 1085.57   | 0.086     | 2 | 48 | R | I | 2.5  | 3   |
|    |             |                                               | SPAVATSTAAPPPSPPLPSK                                           |                 | 114730 | 1.313 | 1.113 | 6.621  | 2.100 | 472.31   | 942.60    | 942.54    | 0.060     | 2 | 46 | K | E |      |     |
|    |             |                                               | RYPSSISSPOK                                                    | 1Arg10          |        |       |       |        |       | 550.29   | 1098.57   | 1098.50   | 0.075     | 2 | 42 | K | T |      |     |
|    |             |                                               | QRPGATAEGR                                                     | 1Arg10          |        |       |       |        |       | 654.50   | 1959.13   | 1959.30   | 0.096     | 3 | 32 | K | S | 12   | 9   |
|    |             |                                               | NPDSAVHSPTK                                                    |                 |        |       |       |        |       | 673.89   | 1345.76   | 1345.71   | 0.106     | 2 | 34 | R | D |      |     |
|    |             |                                               | IFTASNSSVPLPAENVTITAGQR                                        | 1Arg10          |        |       |       |        |       | 439.94   | 1316.79   | 1316.17   | 0.037     | 3 | 58 | K | L |      |     |
|    |             |                                               | IDLAVLLGK                                                      |                 |        |       |       |        |       | 693.88   | 1385.74   | 1385.66   | 0.020     | 2 | 42 | K | R |      |     |
|    |             |                                               | GGSTTGSQFLEQFK                                                 |                 |        |       |       |        |       | 828.15   | 2481.43   | 2481.31   | 0.121     | 3 | 37 | K | I |      |     |
|    |             |                                               | GGSTTGSQFLEQFK                                                 |                 |        |       |       |        |       | 471.33   | 940.65    | 940.60    | 0.062     | 2 | 64 | R | T |      |     |
|    |             |                                               | FPLDYYSIFPPTPTPLTGR                                            | 1Arg10          |        |       |       |        |       | 743.91   | 1485.80   | 1485.71   | 0.048     | 2 | 38 | K | T |      |     |
|    |             |                                               | DGSLASNPYSGDLTK                                                |                 |        |       |       |        |       | 743.91   | 1485.80   | 1485.78   | 0.030     | 2 | 38 | K | T |      |     |
|    |             |                                               | VLAAGLGGGGGSSVLSGLSDPR                                         | 1Arg10          | 140169 | 1.511 | 1.023 | 3.7624 | 1.853 | 765.08   | 2292.21   | 2292.17   | 0.043     | 3 | 35 | R | D |      |     |
|    |             |                                               | TVNATGSSAAGSSDKPSDPR                                           | 1Arg10          |        |       |       |        |       | 762.91   | 1523.81   | 1523.71   | 0.084     | 2 | 65 | R | F |      |     |
|    |             |                                               | TVLWNPEDLPLPIK                                                 |                 |        |       |       |        |       | 390.72   | 779.43    | 779.41    | 0.112     | 2 | 30 | K | C | 13   | 10  |
|    |             |                                               | QQTSSRPASVGLSSSLGDPDR                                          | 2Arg10          |        |       |       |        |       | 861.83   | 2582.46   | 2582.4    | 0.042     | 3 | 71 | R | T |      |     |
|    |             |                                               | IPSLFEIWRPTGQLAEK                                              | 1Arg10          |        |       |       |        |       | 671.35   | 2011.04   | 2010.96   | 0.035     | 3 | 30 | K | V |      |     |
|    |             |                                               | DVTLSPKPSAR                                                    | 1Arg10          |        |       |       |        |       | 923.08   | 1844.14   | 1844.1    | 0.042     | 2 | 36 | R | Q |      |     |
|    |             |                                               | AVNIFLDPLPGHPLRDR                                              | 2Arg10          |        |       |       |        |       | 778.43   | 2332.27   | 2315.1256 | 0.116     | 3 | 30 | R | L |      |     |
|    |             |                                               | AVNIFLDPLPGHPLR                                                | 2Arg10          |        |       |       |        |       | 669.74   | 2006.2    | 2006.15   | 0.016     | 3 | 34 | K | L |      |     |
|    |             |                                               | ALPTSKPEGLHSSPVGPSSSK                                          |                 |        |       |       |        |       | 615.67   | 1229.73   | 1229.69   | 0.067     | 2 | 30 | K | T |      |     |
|    |             |                                               | DLTEYLSR                                                       | 1Arg10          | 46409  | 4.128 | 2.285 | 9.993  | 5.218 | 666.4    | 1996.19   | 1996.14   | 0.024     | 3 | 68 | K | S |      |     |
|    |             |                                               | GFQVLFK                                                        |                 |        |       |       |        |       | 540.34   | 1617.99   | 1617.95   | 0.048     | 3 | 30 | K | D |      |     |
|    |             |                                               | GFQVLFK                                                        |                 |        |       |       |        |       | 538.3    | 2149.18   | 2149.09   | 0.023     | 3 | 30 | R | G |      |     |
|    |             |                                               | KDLTEYLSR                                                      | 1Arg10          |        |       |       |        |       | 503.76   | 1005.50   | 1005.50   | 0.00      | 2 | 40 | K | F | 15.5 | 7   |
|    |             |                                               | LLESR                                                          | 1Arg10          |        |       |       |        |       | 457.77   | 913.52    | 913.51    | 0.01      | 2 | 43 | R | D |      |     |
|    |             |                                               | MFIGGLSWDTSK                                                   | 1Met(ox)        |        |       |       |        |       | 457.78   | 913.55    | 913.51    | 0.05      | 2 | 38 | R | D |      |     |
|    |             |                                               | MFIGGLSWDTSK                                                   |                 |        |       |       |        |       | 567.81   | 1133.61   | 1133.60   | 0.01      | 2 | 36 | K | F |      |     |
|    |             |                                               | VFIGGLSPDTSEEQIK                                               |                 |        |       |       |        |       | 314.20   | 626.38    | 626.36    | 0.02      | 2 | 31 | K | Y |      |     |
|    |             |                                               | YHQIGSGK                                                       |                 |        |       |       |        |       | 679.34   | 1356.66   | 1356.64   | 0.02      | 2 | 62 | K | K |      |     |
|    |             |                                               |                                                                |                 |        |       |       |        |       | 671.33   | 1340.65   | 1340.64   | 0.01      | 2 | 80 | K | K |      |     |
|    |             |                                               |                                                                |                 |        |       |       |        |       | 853.43   | 1704.85   | 1704.86   | -0.01     | 2 | 88 | K | E |      |     |
|    |             |                                               |                                                                |                 |        |       |       |        |       | 445.24   | 888.46    | 888.45    | 0.02      | 2 | 30 | R | C |      |     |

PS: \* "w" refers to the Arg0, "i" refers to the Arg6 and "h" refers to the Arg10
