# Supplementary material
Source: PubMed Central journal article supplement (PMC2658890)
Supplement: pr800198w-File004.pdf [file pr800198w-File004.pdf]

## Supplementary Table 2

### A list of peptides spotted on peptide microarrays

|   | <b>Protein</b>                          | <b>Accession</b> | <b>Wildtype peptide sequence</b>                                                                                                                                                                | <b>Mutant peptide sequence (containing a Y→F substitution)</b>                                                                                                                                  |
|---|-----------------------------------------|------------------|-------------------------------------------------------------------------------------------------------------------------------------------------------------------------------------------------|-------------------------------------------------------------------------------------------------------------------------------------------------------------------------------------------------|
| 1 | Similar to splicing factor 3B subunit 2 | XP_290506.3      | AMTQKYEEHVR<br>DVEIEYVTEEP<br>EEPEIYEPNFI<br>ERLQSYTRQTG<br>GGSKKYKEFKF<br>GPPPSYPNLKI<br>GSTHIYDMSTV<br>HGDLYYEGKEF<br>IAMQRYGPPPS<br>IHGDLYYEGKE<br>KIDIDYQKLHD<br>PPPGHYGAWAA<br>TGKPLYGDVFG | AMTQKFEEHVR<br>DVEIEFVTEEP<br>EEPEIFEPNFI<br>ERLQSFTRQTG<br>GGSKKFKEFKF<br>GPPPSFPNLKI<br>GSTHIFDMSTV<br>HGDLYFEGKEF<br>IAMQRFGPPPS<br>IHGDLFYEGKE<br>KIDIDFQKLHD<br>PPPGHFGAWAA<br>TGKPLFGDVFG |
| 2 | Chromosome 19 open reading frame 7      | NP_055983        | AQRALYLRIQQ<br>DDEFYDEDMG<br>DDYDEYSKELN<br>DEEDFYEEEMD<br>DRYNSYNRPRP<br>DTGNWYSSDED<br>EDYGHYEELPG<br>EEEMDYGESEE<br>EQYGEYEGDEE<br>EYSPPYAPFWP<br>FYENFYQQQEG<br>GGGGSYRSRDH<br>GMYEDYENEQY  | AQRALFLRIQQ<br>DDEDFEDEDMG<br>DDYDEFKELN<br>DEEDFFEEEMD<br>DRYNSFNPRP<br>DTGNWFSSDED<br>EDYGHFEELPG<br>EEEMDFGESEE<br>EQYGEFEGDEE<br>EYSPPFAPFWP<br>FYENFFQQQEG<br>GGGGSFRSRDH<br>GMYEDFENEQY   |

|              |             |
|--------------|-------------|
| GRGRGYRGRGS  | GRGRGFRGRGS |
| IAIEDYGHYEE  | IAIEDFGHYEE |
| KELNQYRRSKD  | KELNQFRRAKE |
| KELNQYRRSKD  | KELNQFRRAKE |
| KGHRKYREYSP  | KGHRKFREYSP |
| KSYGMYEDYEN  | KSYGMFEDYEN |
| LAPFGYFRLPS  | LAPFGFFRLPS |
| LPKKAYSKMDS  | LPKKAFSKMDS |
| MDSKSYGMYED  | MDSKSFMYED  |
| MGDDDYDEYSK  | MGDDDFDEYSK |
| MGKEDYDDFTK  | MGKEDFDDFTK |
| MHDILYLDVHL  | MHDILFLVDHL |
| MTLKKYREFLL  | MTLKKFREFLL |
| PAQNFYENFYQ  | PAQNFFENFYQ |
| PATAPYDPRVL  | PATAPFDPRVL |
| PPASLYHTTGN  | PPASLFHTTGN |
| PPMMPYGPADS  | PPMMPFGPADS |
| QQQDMYNKKIP  | QQQDMFNKKIP |
| RKYREYSPPYA  | RKYREFSPPYA |
| SGISLYDP RTP | SGISLFDPRTP |
| TPTDRYNSYNR  | TPTDRFNSYNR |
| TSHQQYPPSHA  | TSHQQFPPSHA |
| YENEQYGEYEG  | YENEQFGEYEG |

3 Arsenate resistance protein ARS2 isoform b

NP\_877952.1

|              |              |
|--------------|--------------|
| AGRGNYDAFRG  | AGRGNFDAFRG  |
| DKLLLYLRIVH  | DKLLLF LRIVH |
| EAVKRYNDYKL  | EAVKRFNDYKL  |
| GGGPTYGPPQP  | GGGPTFGPPQP  |
| GYEMPYAGGGG  | GYEMPFAGGGG  |
| HSSDPYHSGYE  | HSSDPFHSGYE  |
| KNITDYLIEEV  | KNITDFLIEEV  |
| KRYNDYKLD FR | KRYNDFKLD FR |
| PPILGYGAGAV  | PPILGFGAGAV  |
| PYHSGYEMPYA  | PYHSGFEMPYA  |
| QGLMPYGQPRP  | QGLMPFGQPRP  |
| RAIVEYRDLDA  | RAIVEFRDLDA  |

|   |                                       |             |              |
|---|---------------------------------------|-------------|--------------|
|   |                                       | RGQGGYPGKPR | RGQGGFPGKPR  |
|   |                                       | TGGPPYPHAPY | TGGPPFPHAPY  |
|   |                                       | TPGLPYPHQTP | TPGLPFPHQTP  |
|   |                                       | WFRSKYHPDEV | WFRSKFHPDEV  |
|   |                                       | YPHAPYGAGRG | YPHAPFGAGRG  |
| 4 | Ataxin 2 related protein isoform B    | NP_663760.1 |              |
|   |                                       | AVGRMYPPRSP | AVGRMFPPRSP  |
|   |                                       | ESSPQYRLRIA | ESSPQFRLRIA  |
|   |                                       | FNEENYGVKTT | FNEENFGVKTT  |
|   |                                       | GQQGKYRGAKG | GQQGKFRGAKG  |
|   |                                       | GQSGLYSPQYI | GQSGLFSPQYI  |
|   |                                       | GVKTTYDSSLS | GVKTFDSSLS   |
|   |                                       | KNGTTYEGIFK | KNGTFEGIFK   |
|   |                                       | LYSPQYISYIP | LYSPQFISYIP  |
|   |                                       | NVDFNYATKDK | NVDFNFATKDK  |
|   |                                       | PQMYPYPVSNS | PQMYPFPVSNS  |
|   |                                       | PQQNLYHPGAL | PQQNLFHPGAL  |
|   |                                       | PQYISYIPQIH | PQYISFIPQIH  |
|   |                                       | PSPYPYIGHPQ | PSPYFFIGHPQ  |
|   |                                       | QAPQMYPYPVS | QAPQMFYPVS   |
|   |                                       | QPAAVYAIHHQ | QPAAVFAIHHQ  |
|   |                                       | QPMAHYPSQPV | QPMAHFPSQPV  |
|   |                                       | SNSDDYDLESD | SNSDDFDLESD  |
|   |                                       | SREGKYIPLPQ | SREGKFIPLPQ  |
|   |                                       | SSLSSYTVPLE | SSLSSF TVPLE |
|   |                                       | SSTPQYPSAEQ | SSTPQFPSAEQ  |
|   |                                       | SSYIPYNPQQF | SSYIPFNPQQF  |
|   |                                       | STPSPYPYIGH | STPSPFPYIGH  |
|   |                                       | TPQALYATVHQ | TPQALFATVHQ  |
|   |                                       | TPYSSYIPYNP | TPYSSFIPYNP  |
|   |                                       | TVHQSYPHHAT | TVHQSFPHHAT  |
|   |                                       | VAATPYSSYIP | VAATPFSSYIP  |
|   |                                       | VFEGVYNNSRM | VFEGVFNNSRM  |
| 5 | Zinc finger, CCHC domain containing 8 | NP_060082.2 |              |
|   |                                       | AISKQYHQEIE | AISKQFHQEIE  |
|   |                                       | DVFANYLTSNF | DVFANFLTSNF  |
|   |                                       | ESTGMYLRIRS | ESTGMFLRIRS  |

|             |             |
|-------------|-------------|
| LPPFIYRMRQL | LPPFIFRMRQL |
| MAAEVYFGDLE | MAAEVFFGDLE |
| MRQLGYPPGWL | MRQLGFPPGWL |
| NFQQRyhAEEV | NFQQRfHAEEV |
| NKsvTYDLSKL | NKsvTFDLSKL |
| SGLALYDGKDG | SGLALFDGKDG |
| SKLVNYPGFNI | SKLVNfPGFNI |
| WEIPKYHQVFS | WEIPKfHQVFS |

|   |                |             |             |             |
|---|----------------|-------------|-------------|-------------|
| 6 | TRK-fused Gene | NP_006061.2 | EVTIKYKDEDG | EVTIKfKDEDG |
|   |                |             | IEGQMYQQYQQ | IEGQMfQQYQQ |
|   |                |             | NEDITYDELVL | NEDITfDELVL |
|   |                |             | PFGQGYTQPGP | PFGQGfTQPGP |
|   |                |             | PQQPPYTGAQT | PQQPPfTGAQT |
|   |                |             | QGYTQPGPGYR | QGYTQPGPGfR |
|   |                |             | QMYQQYQQQAG | QMYQQfQQQAG |
|   |                |             | QPPQYQASNY  | QPPQfQASNY  |
|   |                |             | QQFQGYGQQPT | QQFQGFQGPt  |
|   |                |             | QQPQQYGIQYS | QQPQQfGIQYS |
|   |                |             | QQQAGYGAQQP | QQQAGfGAQQP |
|   |                |             | QYGIQYSASYS | QYGIQfSASYS |
|   |                |             | QYSASYSQQTG | QYSASfSQQTG |
|   |                |             | SGPNPYARNRP | SGPNPfARNRP |
|   |                |             | SQPGAYQPRPG | SQPGAfQPRPG |
|   |                |             | SQPTNYTVAPA | SQPTNfTVAPA |
|   |                |             | SSQVKYLRREL | SSQVKfLRREL |
|   |                |             | YPAQTYTAQTS | YPAQTfTAQTS |
|   |                |             | YQASNYPaQTY | YQASNfPaQTY |

|   |                           |             |             |             |
|---|---------------------------|-------------|-------------|-------------|
| 7 | A-Kinase anchor protein 8 | NP_005849.1 | ASWQGYENYNY | ASWQGfENYNY |
|   |                           |             | EFLQEYIVNRN | EFLQEfIVNRN |
|   |                           |             | ENYNYYGAQNT | ENYNfYGAQNT |
|   |                           |             | GATYSYGPASW | GATYSfGPASW |
|   |                           |             | KMLEKYLKGED | KMLEKfLKGED |
|   |                           |             | KQFQLYEEPDT | KQFQLfEEPDT |
|   |                           |             | MDQGYGGYGAW | MDQGfGGYGAW |
|   |                           |             | NTQGAYGTGVA | NTQGAFGTGVA |

|   |                               |             |             |              |
|---|-------------------------------|-------------|-------------|--------------|
|   |                               |             | PEHNPYRPSYS | PEHNPFRRPSYS |
|   |                               |             | PYRPSYSYDYE | PYRPSFSYDYE  |
|   |                               |             | QGAGGYDSTMP | QGAGGFDSTMP  |
|   |                               |             | QGYENYNYGA  | QGYENFNYYGA  |
|   |                               |             | QGYGGYGAWSA | QGYGGFGAWSA  |
|   |                               |             | RPSYSYDYEFD | RPSYSFDYEFD  |
|   |                               |             | SMAPDYGVMGM | SMAPDFGVMGM  |
|   |                               |             | SYSYDYEFDLG | SYSYDFEFDLG  |
|   |                               |             | TTGATYSYGPA | TTGATFSYGPA  |
|   |                               |             | WNELNYVGGRG | WNELNFVGGRG  |
|   |                               |             | YENYNYGAQN  | YENYNFYGAQN  |
| 8 | Ras-GTPase-activating protein | NP_005745.1 | DFEQSYGNVVE | DFEQSFGNVVE  |
|   |                               |             | DSGTFYDQAVV | DSGTFFDQAVV  |
|   |                               |             | EFVRQYYTLLN | EFVRQFYTLLN  |
|   |                               |             | FVRQYYTLLNQ | FVRQYFTLLNQ  |
|   |                               |             | GKNSSYVHGGL | GKNSSFVHGGL  |
|   |                               |             | MLHRFYGKNSS | MLHRFFGKNSS  |
|   |                               |             | NDIFRYQDEVF | NDIFRFQDEVF  |
|   |                               |             | PADAVYGQKEI | PADAVFGQKEI  |
|   |                               |             | VANKFYVHNDI | VANKFFVHNDI  |
| 9 | RNA binding motif protein 10  | NP_005667.2 | AAPGIYQQSAE | AAPGIFQQSAE  |
|   |                               |             | ANSQSYTIMSP | ANSQSFTIMSP  |
|   |                               |             | AQSQQYLYWDG | AQSQQFLYWDG  |
|   |                               |             | ARGSSYGVTST | ARGSSFVGTST  |
|   |                               |             | DETSGYYYDPQ | DETSGFYYDPQ  |
|   |                               |             | DPNSQYYNAQ  | DPNSQFYNAQ   |
|   |                               |             | DRTGRYGATDR | DRTGRFGATDR  |
|   |                               |             | EGKHDYDDSSE | EGKHDFDDSSE  |
|   |                               |             | EPPVDYSYYQQ | EPPVDFSYYQQ  |
|   |                               |             | ERREKYGIPEP | ERREKFGIPEP  |
|   |                               |             | ESYSQYPVPDV | ESYSQFPVPDV  |
|   |                               |             | ETSGYYPDPQT | ETSGYFYDPQT  |
|   |                               |             | GALAPYAVLSS | GALAPFAVLSS  |
|   |                               |             | GERTYVPALE  | GERTFVPALE   |
|   |                               |             | GLVAAYSGESD | GLVAAFSGESD  |

|             |             |
|-------------|-------------|
| KVSMHYSDPKP | KVSMHFSDPKP |
| LYAHGYLKGTK | LYAHGFLKGTK |
| MDYRSYPREYG | MDYRSFPREYG |
| MEYERRGGRGD | MEFERRGGRGD |
| MEQMKYRDRAA | MEQMKFRDRAA |
| NSQYYNAQSQ  | NSQYFNAQSQ  |
| PDVSTYQYDET | PDVSTFQYDET |
| PKRRKYGGIST | PKRRKFGGIST |
| PLPQPYQAQGV | PLPQPFQAQGV |
| PNSQYYNAQS  | PNSQYFYNAQS |
| PQTGLYDPNS  | PQTGLFYDPNS |
| PRDGDYRDQDY | PRDGDFRDQDY |
| PVDYSYQQDE  | PVDYSFYQQDE |
| QQDEGYGNSQG | QQDEGFGNSQG |
| QTGLYDPNSQ  | QTGLYFDPNSQ |
| SAEDSYEASPG | SAEDSFEASPG |
| SQQYLYWDGER | SQQYLFWDGER |
| SRDHDYRDMDY | SRDHDFRDMDY |
| SYPREYGSQEG | SYPREFGSQEG |
| TADAGYAILEK | TADAGFAILEK |
| TAQESYSQYPV | TAQESFSQYPV |
| TESSLYAHGYL | TESSLFAHGYL |
| TSGYYYDPQTG | TSGYYFDPQTG |
| TSTESYKETLH | TSTESFKETLH |
| VDYSYQQDEG  | VDYSYFQQDEG |
| VSTYQYDETSQ | VSTYQFDETSQ |
| YRDMDYRSYPR | YRDMDFRSYPR |
| YRDQDYRTEQG | YRDQDFRTEQG |

10 Thyroid hormone receptor-associated protein

NP\_005110.1

|             |             |
|-------------|-------------|
| AYTKRYLEEOK | AYTKRFLEEOK |
| ERFTKYLKRGT | ERFTKFLKRGT |
| FRRPYFRGRN  | FRRPYFFRGRN |
| FRVTAYKAVQE | FRVTAFKAVQE |
| GGYGNYSNWQ  | GGFGNFRSNWQ |
| GHNRYRRPYY  | GHNRFRRPYY  |
| GYRRPYFRGR  | GYRRPFYFRGR |

|    |                                        |             |             |              |
|----|----------------------------------------|-------------|-------------|--------------|
|    |                                        |             | KAEGKYKDDPV | KAEGKFKDDPV  |
|    |                                        |             | KSKKYFLHDDR | KSKKYFLHDDR  |
|    |                                        |             | NHPRVYQNRDF | NHPRVFQNRDF  |
|    |                                        |             | NYRQAYSPRRG | NYRQAFSPRRG  |
|    |                                        |             | PKSKKYFLHDD | PKSKKFYLHDD  |
|    |                                        |             | PREPGYKAEGK | PREPGFKAEGK  |
|    |                                        |             | PSGAGYQSGTH | PSGAGFQSGTH  |
|    |                                        |             | QSPKRYKLRDD | QSPKRFKLRDD  |
|    |                                        |             | QSSHSYKAEFY | QSSHSFKAEFY  |
|    |                                        |             | RNRGFYPWGQY | RNRGFFPWGQY  |
|    |                                        |             | SGGAAATKRYL | SGGAAF'TKRYL |
|    |                                        |             | SNWQNYRQAYS | SNWQNFQAYS   |
|    |                                        |             | SRSRSYSPAHN | SRSRSFSPAHN  |
|    |                                        |             | STGSTYGSQK  | STGSTFGSSQK  |
|    |                                        |             | WEGLVYAPPGK | WEGLVFAPPGK  |
|    |                                        |             | WGRGNYSNNN  | WGRGNFSGNNN  |
|    |                                        |             | WPDATYGTGSA | WPDATF'GTGSA |
|    |                                        |             | YKAEFYTEETE | YKAEFFTEETE  |
|    |                                        |             | YNRGGYGNYS  | YNRGGF'GNYS  |
|    |                                        |             | YPWGQYNRGGY | YPWGQFNRGGY  |
|    |                                        |             | YRRPYFRGRN  | FRRPYFRGRN   |
| 11 | Splicing factor proline/glutamine rich | NP_005057.1 | EMEDAYHEHQA | EMEDAFHEHQA  |
|    |                                        |             | GGGIGYEANPG | GGGIGFEANPG  |
|    |                                        |             | GTPAGYGRGRE | GTPAGFGRGRE  |
|    |                                        |             | HGTFEYEQSR  | HGTFEFEYSQR  |
|    |                                        |             | NMGDPYGGGQ  | NMGDPFGSGGQ  |
|    |                                        |             | QHHAPYHQHH  | QHHAPFHQQHH  |
|    |                                        |             | QKNPMYQKERE | QKNPMFQKERE  |
|    |                                        |             | QREESYSRMGY | QREESFSRMGY  |
|    |                                        |             | RGREYEGPNK  | RGREEFEGPNK  |
|    |                                        |             | RLFAKYGEPGE | RLFAKFGEPGE  |
|    |                                        |             | RNLSPYVSNEL | RNLSPFVSNEL  |
|    |                                        |             | TFEYEQSRWK  | TFEYEF'QSRWK |
|    |                                        |             | YSRMGYMDPRE | YSRMGFMDPRE  |
| 12 | Far upstream element-binding protein   | NP_003893.2 | AAWAAYAHYY  | AAWAIFYAHYY  |

|             |             |
|-------------|-------------|
| AAWAEYYRQQA | AAWAEFYRQQA |
| AAWAEYFRQQA | AAWAEFFRQQA |
| AGQVDYTKAWE | AGQVDFTKAWE |
| AWAAYYAHYYQ | AWAAYFAHYYQ |
| AWAEYFRQQA  | AWAEYFRQQA  |
| AWAEYYRQQA  | AWAEYYRQQA  |
| AWEEYYKMGQ  | AWEEYFKMGQ  |
| AYYAHYYQQQA | AYYAHFYQQQA |
| EVRNEYGSRIG | EVRNEFGSRIG |
| GGQPDYSAAWA | GGQPDFSAAWA |
| GPPAPYAPQGW | GPPAPFAPQGW |
| GWGNAYPHWQQ | GWGNAPPHWQQ |
| ITGDPYKVQQA | ITGDPFKVQQA |
| KAWEEYYKMG  | KAWEEFYKMG  |
| LNSNDYGYGGQ | LNSNDFGYGGQ |
| MADYSTVPPPS | MADFSTVPPPS |
| PQQIDYARQLI | PQQIDFARQLI |
| QQAAYYAQTSP | QQAAFYAQTSP |
| RQQAAYYAQTS | RQQAIFYAQTS |
| SNDYGYGGQKR | SNDYGFGGQKR |
| TPMGPYNPAPY | TPMGPFNPAPY |
| VMTEEYKVPDG | VMTEEFKVPDG |
| YNPAPYNPGPP | YNPAPFNPGPP |
| YYAHYYQQQAQ | YYAHFYQQQAQ |

13 KH-type splicing regulatory protein(FUSE-2)

NP\_003676.1

|             |             |
|-------------|-------------|
| AAWAAYSHY   | AAWAAFYSHY  |
| AWAAYSHYYQ  | AWAAYFSHYQ  |
| AWEEYKIGQ   | AWEEYFKIGQ  |
| AWEEYKQAQ   | AWEEYFKQAQ  |
| AYYSHYYQPP  | AYYSHFYQPP  |
| GDRNEYGSRIG | GDRNEFGSRIG |
| GSQPDYSAAWA | GSQPDFSAAWA |
| GWGNTYPQWQP | GWGNTFPQWQP |
| IIGDPYKVQQA | IIGDPFKVQQA |
| KAWEEYKIG   | KAWEEFYKIG  |
| KAWEEYKQA   | KAWEEFYKQA  |



|    |                                     |             |              |
|----|-------------------------------------|-------------|--------------|
|    |                                     | MSDYSTGGPPP | MSDFSTGGPPP  |
|    |                                     | PPPHQYPPQGW | PPPHQFPPQGW  |
|    |                                     | PPQQDYTKAWE | PPQQDFTKAWE  |
|    |                                     | QQAAAYGQTPG | QQAAAYFGQTPG |
|    |                                     | RQQAAYYGQTP | RQQAAYFGQTP  |
|    |                                     | SMTEEYRVPDG | SMTEEFRVPDG  |
|    |                                     | TGQSDYTKAWE | TGQSDFTKAWE  |
|    |                                     | YYSHYYQQPPG | YYSHYFQQPPG  |
| 14 | Bcl-2-associated transcriton factor | NP_055554.1 |              |
|    |                                     | DDGVDYWAKRG | DDGVDFWAKRG  |
|    |                                     | DYRRDYRNNRG | DYRRDFRNNRG  |
|    |                                     | EEGLKYKSKVS | EEGLKFKSKVS  |
|    |                                     | EETEDYRQFRK | EETEDFRQFRK  |
|    |                                     | ERFTSYQKATE | ERFTSFQKATE  |
|    |                                     | EWDPEYTPKSK | EWDPEFTPKSK  |
|    |                                     | EWDPEYTPKSK | EWDPEYTPKSK  |
|    |                                     | GGGGRYHRGGY | GGGGRFHRGGY  |
|    |                                     | GMRRPYGYRGR | GMRRPFGYRGR  |
|    |                                     | GRGRGYQGGG  | GRGRGFYQGGG  |
|    |                                     | GRSSFYPDGGD | GRSSFFPDGGD  |
|    |                                     | HEMKEYSGFAG | HEMKEFSGFAG  |
|    |                                     | HVKEQYFKSAA | HVKEQFFKSAA  |
|    |                                     | KDLFDYSPPLH | KDLFDFSPPLH  |
|    |                                     | KDYKEYKSYKD | KDYKEFKSYKD  |
|    |                                     | KEYKSYKDDSK | KEYKSFKDDSK  |
|    |                                     | KTPKDYKEYKS | KTPKDFKEYKS  |
|    |                                     | LKETGYVVERP | LKETGFVVERP  |
|    |                                     | MYSRDYRRDYR | MYSRDFRRDYR  |
|    |                                     | NGSSRYSPSQN | NGSSRFSPSQN  |
|    |                                     | PGLSAYDNSPR | PGLSAFDNSPR  |
|    |                                     | PKSKKYFLHDD | PKSKKFFLHDD  |
|    |                                     | QEALDYFSDKE | QEALDFFSDKE  |
|    |                                     | REEKNYKLKET | REEKNFKLKET  |
|    |                                     | RGRGYQGGGG  | RGRGYFQGGGG  |
|    |                                     | RRPYGYRGRGR | RRPYGFRGRGR  |
|    |                                     | RSRRSYRSSRS | RSRRSFRSSRS  |

RSSSPYKSPV

SRDRMYSRDYR

SRKKRYSSRSR

SRSRTYSRSRS

WTHDKYQGDGI

YHRGGYRPVWN

RSSSPFSKSPV

SRDRMFSDYR

SRKKRFSSRSR

SRSRTFSDRSRS

WTHDKFQGDGI

FHRGGFRPVWN
