# Supplementary material
Source: PubMed Central journal article supplement (PMC2658890)
Supplement: pr800198w-File005.pdf [file pr800198w-File005.pdf]

# Mascot Search Results

## Peptide View

MS/MS Fragmentation of **NASTFEDVTQVSSAYQK**

Found in **gi|20357552**, NP\_005222.2| cortactin isoform a [Homo sapiens]

Match to Query 165: 1953.955448 from(977.985000,2+)

From data file hm160404\_AK\_SILAC3\_Src\_0006A.pkl

Click mouse within plot area to zoom in by factor of two about that point

Or,  to  Da

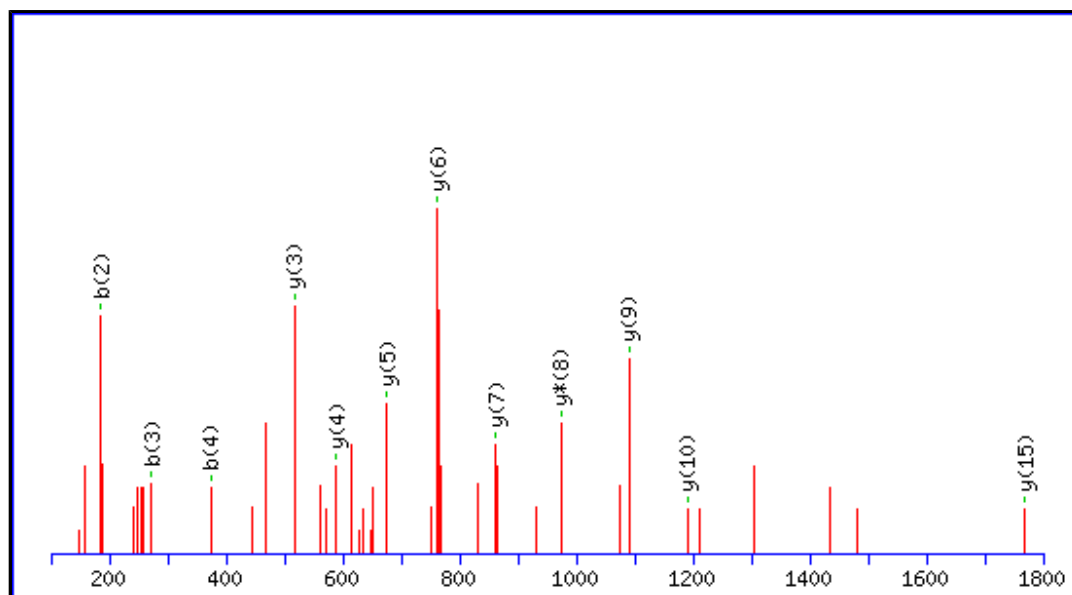

**Monoisotopic mass of neutral peptide Mr(calc):** 1953.84

**Fixed modifications:** Oxidation (M)

**Variable modifications:**

Y15 : Phospho (Y)

**Ions Score:** 42 **Expect:** 0.017

**Matches (Bold Red):** 12/192 fragment ions using 27 most intense peaks

| #  | a       | a <sup>++</sup> | a*      | a <sup>*++</sup> | b             | b <sup>++</sup> | b*      | b <sup>*++</sup> | Seq. | y              | y <sup>++</sup> | y*            | y <sup>*++</sup> | #  |
|----|---------|-----------------|---------|------------------|---------------|-----------------|---------|------------------|------|----------------|-----------------|---------------|------------------|----|
| 1  | 87.06   | 44.03           | 70.03   | 35.52            | 115.05        | 58.03           | 98.02   | 49.52            | N    |                |                 |               |                  | 17 |
| 2  | 158.09  | 79.55           | 141.07  | 71.04            | <b>186.09</b> | 93.55           | 169.06  | 85.03            | A    | 1840.80        | 920.90          | 1823.77       | 912.39           | 16 |
| 3  | 245.12  | 123.07          | 228.10  | 114.55           | <b>273.12</b> | 137.06          | 256.09  | 128.55           | S    | <b>1769.76</b> | 885.39          | 1752.74       | 876.87           | 15 |
| 4  | 346.17  | 173.59          | 329.15  | 165.08           | <b>374.17</b> | 187.59          | 357.14  | 179.07           | T    | 1682.73        | 841.87          | 1665.70       | 833.36           | 14 |
| 5  | 493.24  | 247.12          | 476.21  | 238.61           | 521.24        | 261.12          | 504.21  | 252.61           | F    | 1581.68        | 791.35          | 1564.66       | 782.83           | 13 |
| 6  | 622.28  | 311.65          | 605.26  | 303.13           | 650.28        | 325.64          | 633.25  | 317.13           | E    | 1434.61        | 717.81          | 1417.59       | 709.30           | 12 |
| 7  | 737.31  | 369.16          | 720.28  | 360.65           | 765.30        | 383.16          | 748.28  | 374.64           | D    | 1305.57        | 653.29          | 1288.55       | 644.78           | 11 |
| 8  | 836.38  | 418.69          | 819.35  | 410.18           | 864.37        | 432.69          | 847.35  | 424.18           | V    | <b>1190.55</b> | 595.78          | 1173.52       | 587.26           | 10 |
| 9  | 937.43  | 469.22          | 920.40  | 460.70           | 965.42        | 483.21          | 948.39  | 474.70           | T    | <b>1091.48</b> | 546.24          | 1074.45       | 537.73           | 9  |
| 10 | 1065.48 | 533.25          | 1048.46 | 524.73           | 1093.48       | 547.24          | 1076.45 | 538.73           | Q    | 990.43         | 495.72          | <b>973.40</b> | 487.20           | 8  |
| 11 | 1164.55 | 592.78          | 1147.52 | 574.27           | 1193.55       | 596.78          | 1176.52 | 589.26           | N    | 862.27         | 431.60          | 845.24        | 422.18           | 7  |

|           |         |        |         |        |         |        |         |        |          |               |        |        |        |          |
|-----------|---------|--------|---------|--------|---------|--------|---------|--------|----------|---------------|--------|--------|--------|----------|
| <b>11</b> | 1104.55 | 582.78 | 1147.55 | 574.27 | 1192.55 | 596.78 | 1175.52 | 588.20 | <b>V</b> | <b>802.57</b> | 451.09 | 845.54 | 425.18 | <b>7</b> |
| <b>12</b> | 1251.59 | 626.30 | 1234.56 | 617.78 | 1279.58 | 640.29 | 1262.55 | 631.78 | <b>S</b> | <b>763.30</b> | 382.15 | 746.28 | 373.64 | <b>6</b> |
| <b>13</b> | 1338.62 | 669.81 | 1321.59 | 661.30 | 1366.61 | 683.81 | 1349.59 | 675.30 | <b>S</b> | <b>676.27</b> | 338.64 | 659.24 | 330.13 | <b>5</b> |
| <b>14</b> | 1409.65 | 705.33 | 1392.63 | 696.82 | 1437.65 | 719.33 | 1420.62 | 710.81 | <b>A</b> | <b>589.24</b> | 295.12 | 572.21 | 286.61 | <b>4</b> |
| <b>15</b> | 1652.68 | 826.85 | 1635.66 | 818.33 | 1680.68 | 840.84 | 1663.65 | 832.33 | <b>Y</b> | <b>518.20</b> | 259.60 | 501.17 | 251.09 | <b>3</b> |
| <b>16</b> | 1780.74 | 890.87 | 1763.72 | 882.36 | 1808.74 | 904.87 | 1791.71 | 896.36 | <b>Q</b> | 275.17        | 138.09 | 258.14 | 129.58 | <b>2</b> |
| <b>17</b> |         |        |         |        |         |        |         |        | <b>K</b> | 147.11        | 74.06  | 130.09 | 65.55  | <b>1</b> |

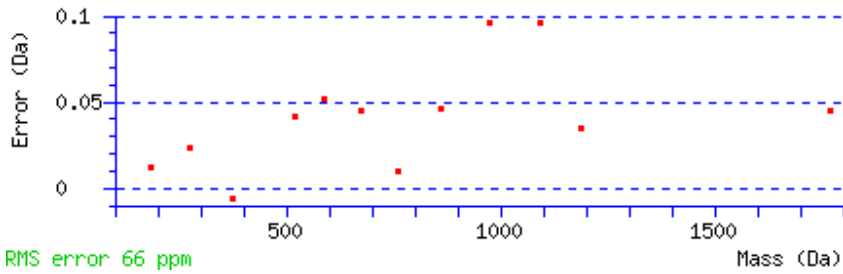

NCBI **BLAST** search of NASTFEDVTQVSSAYQK

# MASCOT SCIENCE Mascot Search Results

## Peptide View

MS/MS Fragmentation of **GPSYGLSAEVK**

Found in **gi|4502923**, NP\_001830.1| calponin 3 [Homo sapiens]

Match to Query 362: 1186.545139 from(594.279845,2+)

File: band\_16\_38kDa.wiff, Sample: band\_16\_38kDa3 (sample number 1), Elution: 17.26 min, Period: 1,

Cycle(s): 605 (Experiment 4)

From data file mas5.tmp

Click mouse within plot area to zoom in by factor of two about that point

Or,  to  Da

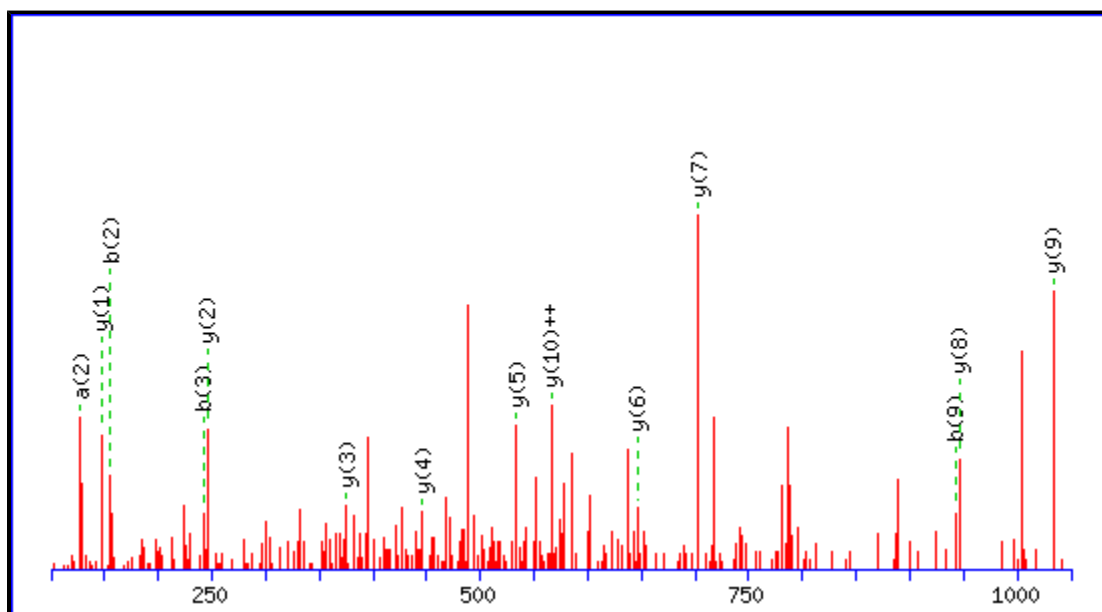

**Monoisotopic mass of neutral peptide Mr(calc):** 1186.53

**Fixed modifications:** Oxidation (M)

**Variable modifications:**

**Y4** : Phospho (Y)

**Ions Score:** 46 **Expect:** 0.0078

**Matches (Bold Red):** 14/80 fragment ions using 41 most intense peaks

| # | a             | a <sup>++</sup> | b             | b <sup>++</sup> | Seq.     | y              | y <sup>++</sup> | y*      | y* <sup>++</sup> | #         |
|---|---------------|-----------------|---------------|-----------------|----------|----------------|-----------------|---------|------------------|-----------|
| 1 | 30.03         | 15.52           | 58.03         | 29.52           | <b>G</b> |                |                 |         |                  | <b>11</b> |
| 2 | <b>127.09</b> | 64.05           | <b>155.08</b> | 78.04           | <b>P</b> | 1130.51        | <b>565.76</b>   | 1113.49 | 557.25           | <b>10</b> |
| 3 | 214.12        | 107.56          | <b>242.11</b> | 121.56          | <b>S</b> | <b>1033.46</b> | 517.23          | 1016.43 | 508.72           | <b>9</b>  |
| 4 | 457.15        | 229.08          | 485.14        | 243.08          | <b>Y</b> | <b>946.43</b>  | 473.72          | 929.40  | 465.20           | <b>8</b>  |
| 5 | 514.17        | 257.59          | 542.16        | 271.59          | <b>G</b> | <b>703.40</b>  | 352.20          | 686.37  | 343.69           | <b>7</b>  |
| 6 | 627.25        | 314.13          | 655.25        | 328.13          | <b>L</b> | <b>646.38</b>  | 323.69          | 629.35  | 315.18           | <b>6</b>  |
| 7 | 714.29        | 357.65          | 742.28        | 371.64          | <b>S</b> | <b>533.29</b>  | 267.15          | 516.27  | 258.64           | <b>5</b>  |
| 8 | 785.32        | 393.17          | 813.32        | 407.16          | <b>A</b> | <b>446.26</b>  | 223.63          | 429.23  | 215.12           | <b>4</b>  |

|           |         |        |               |        |          |               |        |        |        |          |
|-----------|---------|--------|---------------|--------|----------|---------------|--------|--------|--------|----------|
| <b>9</b>  | 914.37  | 457.69 | <b>942.36</b> | 471.68 | <b>E</b> | <b>375.22</b> | 188.12 | 358.20 | 179.60 | <b>3</b> |
| <b>10</b> | 1013.43 | 507.22 | 1041.43       | 521.22 | <b>V</b> | <b>246.18</b> | 123.59 | 229.15 | 115.08 | <b>2</b> |
| <b>11</b> |         |        |               |        | <b>K</b> | <b>147.11</b> | 74.06  | 130.09 | 65.55  | <b>1</b> |

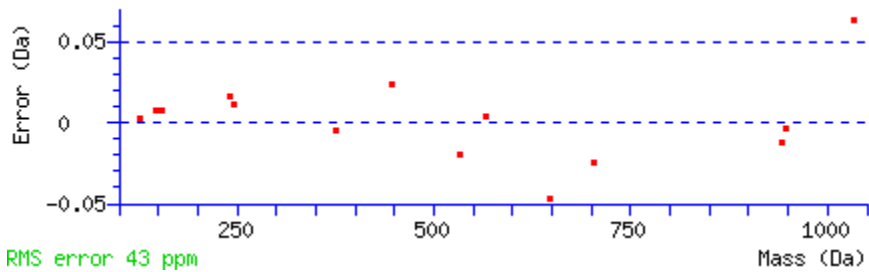

NCBI **BLAST** search of [GPSYGLSAEVK](#)

# MASCOT SCIENCE Mascot Search Results

## Peptide View

MS/MS Fragmentation of **QDHPSSMGVYGQESGGFSGPGENR**

Found in **gi|4885225**, NP\_005234.1| Ewing sarcoma breakpoint region 1 isoform EWS [Homo sapiens]

Match to Query 227: 2585.154972 from(862.725600,3+)

From data file hm160404\_AK\_SILAC3\_Src\_0005A.pkl

Click mouse within plot area to zoom in by factor of two about that point

Or,  to  Da

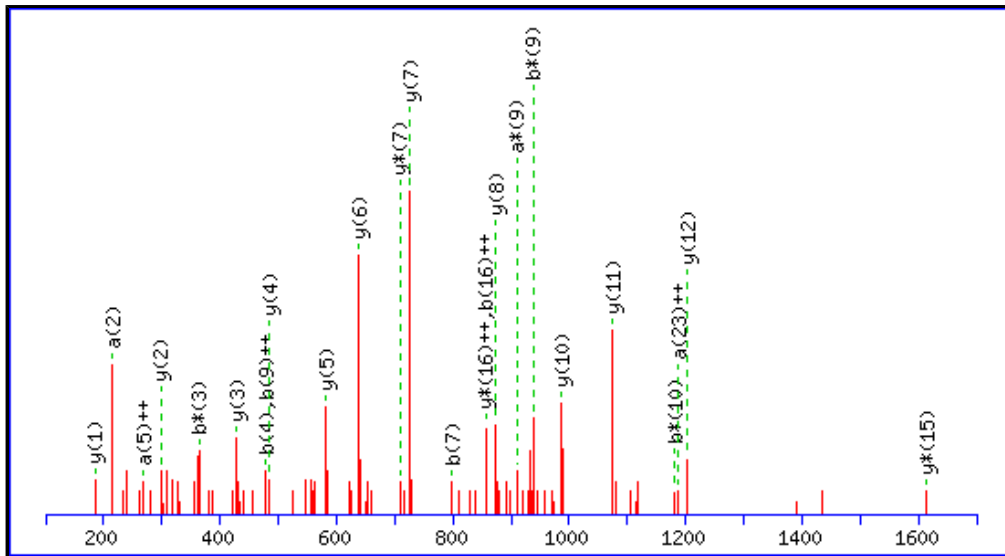

**Monoisotopic mass of neutral peptide Mr(calc):** 2585.02

**Fixed modifications:** Oxidation (M)

**Variable modifications:**

**Y10** : Phospho (Y)

**R24** : Arginine-13C615N4 (R-full)

**Ions Score:** 51 **Expect:** 0.001

**Matches (Bold Red):** 25/276 fragment ions using 47 most intense peaks

| #  | a             | a <sup>++</sup> | a <sup>*</sup> | a <sup>*++</sup> | b             | b <sup>++</sup> | b <sup>*</sup> | b <sup>*++</sup> | Seq.     | y       | y <sup>++</sup> | y <sup>*</sup> | y <sup>*++</sup> | #         |
|----|---------------|-----------------|----------------|------------------|---------------|-----------------|----------------|------------------|----------|---------|-----------------|----------------|------------------|-----------|
| 1  | 101.07        | 51.04           | 84.04          | 42.53            | 129.07        | 65.04           | 112.04         | 56.52            | <b>Q</b> |         |                 |                |                  | <b>24</b> |
| 2  | <b>216.10</b> | 108.55          | 199.07         | 100.04           | 244.09        | 122.55          | 227.07         | 114.04           | <b>D</b> | 2457.96 | 1229.49         | 2440.94        | 1220.97          | <b>23</b> |
| 3  | 353.16        | 177.08          | 336.13         | 168.57           | 381.15        | 191.08          | <b>364.13</b>  | 182.57           | <b>H</b> | 2342.94 | 1171.97         | 2325.91        | 1163.46          | <b>22</b> |
| 4  | 450.21        | 225.61          | 433.18         | 217.10           | <b>478.20</b> | 239.61          | 461.18         | 231.09           | <b>P</b> | 2205.88 | 1103.44         | 2188.85        | 1094.93          | <b>21</b> |
| 5  | 537.24        | <b>269.12</b>   | 520.22         | 260.61           | 565.24        | 283.12          | 548.21         | 274.61           | <b>S</b> | 2108.83 | 1054.92         | 2091.80        | 1046.40          | <b>20</b> |
| 6  | 624.27        | 312.64          | 607.25         | 304.13           | 652.27        | 326.64          | 635.24         | 318.12           | <b>S</b> | 2021.79 | 1011.40         | 2004.77        | 1002.89          | <b>19</b> |
| 7  | 771.31        | 386.16          | 754.28         | 377.64           | <b>799.30</b> | 400.16          | 782.28         | 391.64           | <b>M</b> | 1934.76 | 967.88          | 1917.73        | 959.37           | <b>18</b> |
| 8  | 828.33        | 414.67          | 811.30         | 406.16           | 856.33        | 428.67          | 839.30         | 420.15           | <b>G</b> | 1787.73 | 894.37          | 1770.70        | 885.85           | <b>17</b> |
| 9  | 927.40        | 464.20          | <b>910.37</b>  | 455.69           | 955.39        | <b>478.20</b>   | <b>938.37</b>  | 469.69           | <b>V</b> | 1730.70 | 865.86          | 1713.68        | <b>857.34</b>    | <b>16</b> |
| 10 | 1170.43       | 585.72          | 1153.40        | 577.20           | 1198.42       | 599.72          | <b>1181.40</b> | 591.20           | <b>Y</b> | 1631.64 | 816.32          | <b>1614.61</b> | 807.81           | <b>15</b> |
| 11 | 1227.45       | 614.23          | 1210.42        | 605.72           | 1255.44       | 628.23          | 1238.42        | 619.71           | <b>G</b> | 1388.61 | 694.81          | 1371.58        | 686.29           | <b>14</b> |
| 12 | 1355.51       | 678.26          | 1338.48        | 669.74           | 1383.50       | 692.26          | 1366.48        | 683.74           | <b>Q</b> | 1331.58 | 666.30          | 1314.56        | 657.78           | <b>13</b> |
| 13 | 1484.55       | 742.28          | 1467.50        | 734.27           | 1512.55       | 756.28          | 1495.50        | 748.26           | <b>D</b> | 1302.52 | 602.27          | 1286.50        | 592.75           | <b>12</b> |

|    |         |                |         |         |         |               |         |         |          |                |        |               |        |           |
|----|---------|----------------|---------|---------|---------|---------------|---------|---------|----------|----------------|--------|---------------|--------|-----------|
| 13 | 1484.55 | 742.78         | 1407.52 | 754.27  | 1512.55 | 750.78        | 1495.52 | 748.20  | <b>E</b> | <b>1205.55</b> | 602.27 | 1180.50       | 595.75 | <b>12</b> |
| 14 | 1571.58 | 786.30         | 1554.56 | 777.78  | 1599.58 | 800.29        | 1582.55 | 791.78  | <b>S</b> | <b>1074.48</b> | 537.75 | 1057.46       | 529.23 | <b>11</b> |
| 15 | 1628.60 | 814.81         | 1611.58 | 806.29  | 1656.60 | 828.80        | 1639.57 | 820.29  | <b>G</b> | <b>987.45</b>  | 494.23 | 970.43        | 485.72 | <b>10</b> |
| 16 | 1685.63 | 843.32         | 1668.60 | 834.80  | 1713.62 | <b>857.31</b> | 1696.59 | 848.80  | <b>G</b> | 930.43         | 465.72 | 913.40        | 457.21 | <b>9</b>  |
| 17 | 1832.69 | 916.85         | 1815.67 | 908.34  | 1860.69 | 930.85        | 1843.66 | 922.34  | <b>F</b> | <b>873.41</b>  | 437.21 | 856.38        | 428.69 | <b>8</b>  |
| 18 | 1919.73 | 960.37         | 1902.70 | 951.85  | 1947.72 | 974.36        | 1930.69 | 965.85  | <b>S</b> | <b>726.34</b>  | 363.67 | <b>709.31</b> | 355.16 | <b>7</b>  |
| 19 | 1976.75 | 988.88         | 1959.72 | 980.36  | 2004.74 | 1002.88       | 1987.72 | 994.36  | <b>G</b> | <b>639.31</b>  | 320.16 | 622.28        | 311.64 | <b>6</b>  |
| 20 | 2073.80 | 1037.40        | 2056.77 | 1028.89 | 2101.80 | 1051.40       | 2084.77 | 1042.89 | <b>P</b> | <b>582.29</b>  | 291.65 | 565.26        | 283.13 | <b>5</b>  |
| 21 | 2130.82 | 1065.91        | 2113.80 | 1057.40 | 2158.82 | 1079.91       | 2141.79 | 1071.40 | <b>G</b> | <b>485.23</b>  | 243.12 | 468.21        | 234.61 | <b>4</b>  |
| 22 | 2259.86 | 1130.44        | 2242.84 | 1121.92 | 2287.86 | 1144.43       | 2270.83 | 1135.92 | <b>E</b> | <b>428.21</b>  | 214.61 | 411.19        | 206.10 | <b>3</b>  |
| 23 | 2373.91 | <b>1187.46</b> | 2356.88 | 1178.94 | 2401.90 | 1201.45       | 2384.88 | 1192.94 | <b>N</b> | <b>299.17</b>  | 150.09 | 282.14        | 141.58 | <b>2</b>  |
| 24 |         |                |         |         |         |               |         |         | <b>R</b> | <b>185.13</b>  | 93.07  | 168.10        | 84.55  | <b>1</b>  |

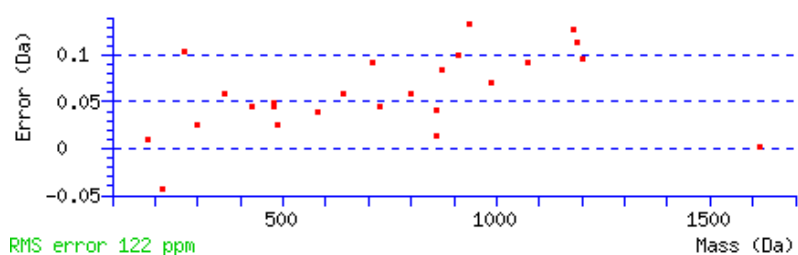

NCBI **BLAST** search of [QDHPSSMGVYQGESGGFSGPGENR](#)

# **MATRIX SCIENCE** Mascot Search Results

## Peptide View

MS/MS Fragmentation of **IGGDAGTSLNSNDYGYGGQK**

Found in **gi|17402900**, NP\_003893.2] far upstream element-binding protein [Homo sapiens]

Match to Query 169: 2052.955248 from(1027.484900,2+)

From data file hm160404\_AK\_SILAC3\_Src\_0007A.pkl

Click mouse within plot area to zoom in by factor of two about that point

Or, Plot from  to  Da

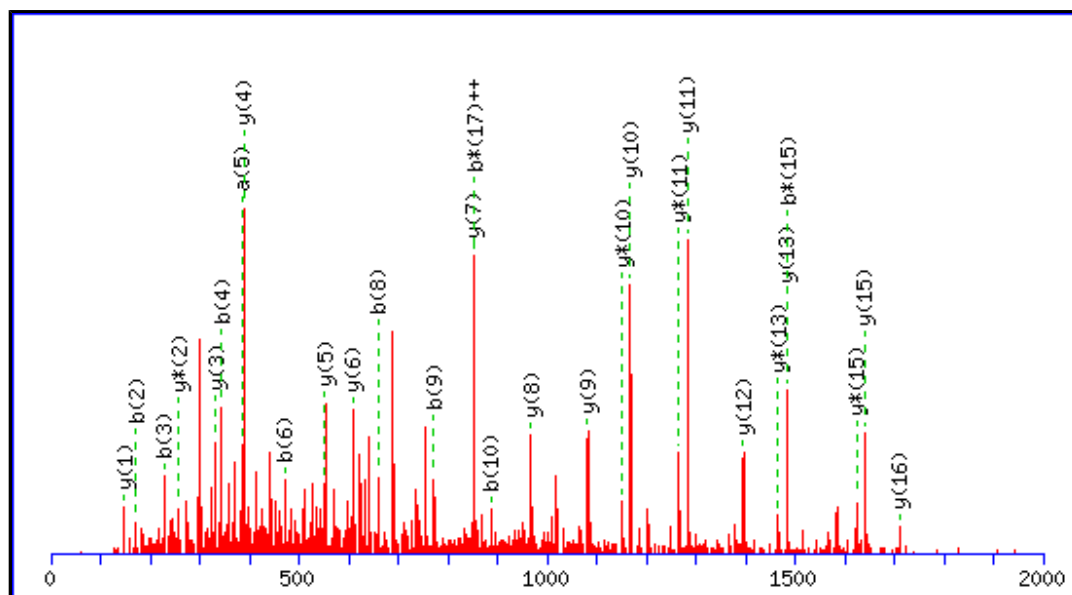

**Monoisotopic mass of neutral peptide Mr(calc):** 2052.84

**Fixed modifications:** Oxidation (M)

**Variable modifications:**

**Y14** : Phospho (Y)

**Ions Score:** 65 **Expect:** 6.2e-05

**Matches (Bold Red):** 29/192 fragment ions using 91 most intense peaks

| #  | a             | a <sup>++</sup> | a*     | a* <sup>++</sup> | b             | b <sup>++</sup> | b*     | b* <sup>++</sup> | Seq.     | y              | y <sup>++</sup> | y*             | y* <sup>++</sup> | #         |
|----|---------------|-----------------|--------|------------------|---------------|-----------------|--------|------------------|----------|----------------|-----------------|----------------|------------------|-----------|
| 1  | 86.10         | 43.55           |        |                  | 114.09        | 57.55           |        |                  | <b>I</b> |                |                 |                |                  | <b>20</b> |
| 2  | 143.12        | 72.06           |        |                  | <b>171.11</b> | 86.06           |        |                  | <b>G</b> | 1940.77        | 970.89          | 1923.74        | 962.37           | <b>19</b> |
| 3  | 200.14        | 100.57          |        |                  | <b>228.13</b> | 114.57          |        |                  | <b>G</b> | 1883.74        | 942.38          | 1866.72        | 933.86           | <b>18</b> |
| 4  | 315.17        | 158.09          |        |                  | <b>343.16</b> | 172.08          |        |                  | <b>D</b> | 1826.72        | 913.87          | 1809.70        | 905.35           | <b>17</b> |
| 5  | <b>386.20</b> | 193.61          |        |                  | 414.20        | 207.60          |        |                  | <b>A</b> | <b>1711.70</b> | 856.35          | 1694.67        | 847.84           | <b>16</b> |
| 6  | 443.22        | 222.12          |        |                  | <b>471.22</b> | 236.11          |        |                  | <b>G</b> | <b>1640.66</b> | 820.83          | <b>1623.63</b> | 812.32           | <b>15</b> |
| 7  | 544.27        | 272.64          |        |                  | 572.27        | 286.64          |        |                  | <b>T</b> | 1583.64        | 792.32          | 1566.61        | 783.81           | <b>14</b> |
| 8  | 631.30        | 316.16          |        |                  | <b>659.30</b> | 330.15          |        |                  | <b>S</b> | <b>1482.59</b> | 741.80          | <b>1465.56</b> | 733.29           | <b>13</b> |
| 9  | 744.39        | 372.70          |        |                  | <b>772.38</b> | 386.70          |        |                  | <b>L</b> | <b>1395.56</b> | 698.28          | 1378.53        | 689.77           | <b>12</b> |
| 10 | 858.43        | 429.72          | 841.41 | 421.21           | <b>886.43</b> | 443.72          | 869.40 | 435.20           | <b>N</b> | <b>1282.47</b> | 641.74          | <b>1265.45</b> | 633.23           | <b>11</b> |

|           |         |        |         |        |         |        |                |               |          |                |        |                |        |           |
|-----------|---------|--------|---------|--------|---------|--------|----------------|---------------|----------|----------------|--------|----------------|--------|-----------|
| <b>11</b> | 945.46  | 473.24 | 928.44  | 464.72 | 973.46  | 487.23 | 956.43         | 478.72        | <b>S</b> | <b>1168.43</b> | 584.72 | <b>1151.40</b> | 576.21 | <b>10</b> |
| <b>12</b> | 1059.51 | 530.26 | 1042.48 | 521.74 | 1087.50 | 544.25 | 1070.47        | 535.74        | <b>N</b> | <b>1081.40</b> | 541.20 | 1064.37        | 532.69 | <b>9</b>  |
| <b>13</b> | 1174.53 | 587.77 | 1157.51 | 579.26 | 1202.53 | 601.77 | 1185.50        | 593.25        | <b>D</b> | <b>967.36</b>  | 484.18 | 950.33         | 475.67 | <b>8</b>  |
| <b>14</b> | 1417.56 | 709.29 | 1400.54 | 700.77 | 1445.56 | 723.28 | 1428.53        | 714.77        | <b>Y</b> | <b>852.33</b>  | 426.67 | 835.30         | 418.15 | <b>7</b>  |
| <b>15</b> | 1474.58 | 737.80 | 1457.56 | 729.28 | 1502.58 | 751.79 | <b>1485.55</b> | 743.28        | <b>G</b> | <b>609.30</b>  | 305.15 | 592.27         | 296.64 | <b>6</b>  |
| <b>16</b> | 1637.65 | 819.33 | 1620.62 | 810.81 | 1665.64 | 833.33 | 1648.62        | 824.81        | <b>Y</b> | <b>552.28</b>  | 276.64 | 535.25         | 268.13 | <b>5</b>  |
| <b>17</b> | 1694.67 | 847.84 | 1677.64 | 839.33 | 1722.66 | 861.84 | 1705.64        | <b>853.32</b> | <b>G</b> | <b>389.21</b>  | 195.11 | 372.19         | 186.60 | <b>4</b>  |
| <b>18</b> | 1751.69 | 876.35 | 1734.66 | 867.84 | 1779.69 | 890.35 | 1762.66        | 881.83        | <b>G</b> | <b>332.19</b>  | 166.60 | 315.17         | 158.09 | <b>3</b>  |
| <b>19</b> | 1879.75 | 940.38 | 1862.72 | 931.87 | 1907.74 | 954.38 | 1890.72        | 945.86        | <b>Q</b> | 275.17         | 138.09 | <b>258.14</b>  | 129.58 | <b>2</b>  |
| <b>20</b> |         |        |         |        |         |        |                |               | <b>K</b> | <b>147.11</b>  | 74.06  | 130.09         | 65.55  | <b>1</b>  |

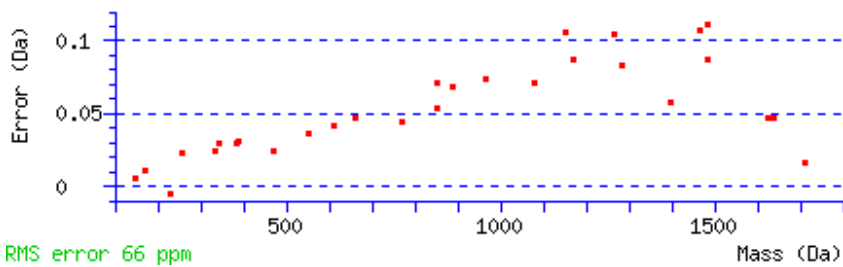

NCBI **BLAST** search of [IGGDAGTSLNSNDYGYGGQK](#)  
 (Parameters: blastp, nr protein database, expect=20000, no filter, PAM30)  
 Other BLAST [web gateways](#)

**Mascot:** <http://www.matrixscience.com/>



# Mascot Search Results

## Peptide View

MS/MS Fragmentation of **TDYNASVSPDSSGPER**

Found in **gi|14165435**, NP\_112552.1| heterogeneous nuclear ribonucleoprotein K isoform b [Homo sapiens]

Match to Query 160: 1869.871448 from(935.943000,2+)

From data file hm160404\_AK\_SILAC3\_Src\_0009A.pkl

Click mouse within plot area to zoom in by factor of two about that point

Or,  to  Da

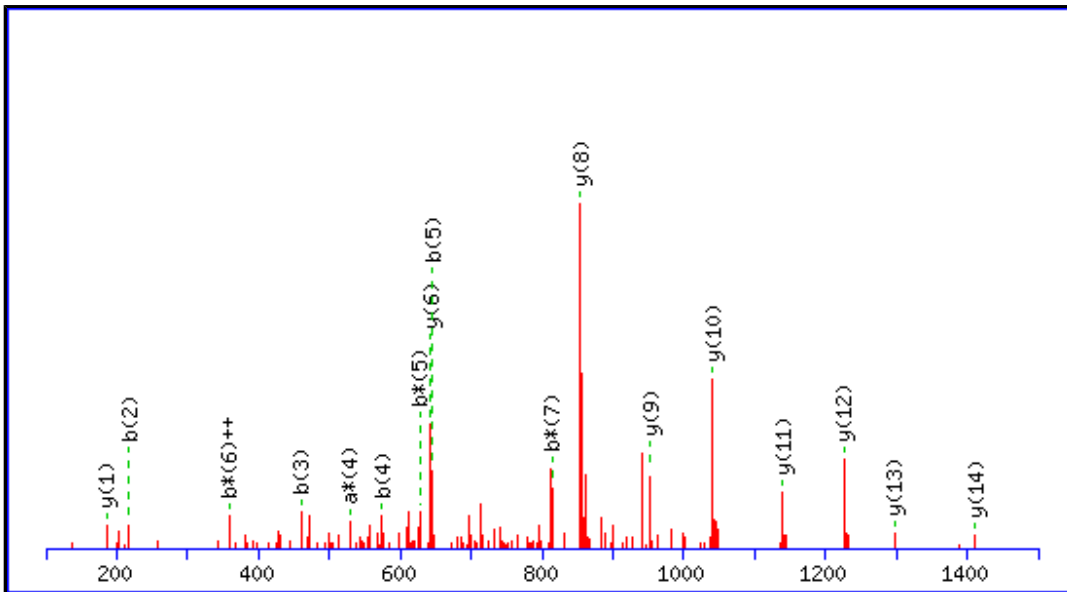

**Monoisotopic mass of neutral peptide Mr(calc):** 1869.77

**Fixed modifications:** Oxidation (M)

**Variable modifications:**

**Y3** : Phospho (Y)

**R17** : Arginine-13C615N4 (R-full)

**Ions Score:** 47 **Expect:** 0.005

**Matches (Bold Red):** 17/180 fragment ions using 37 most intense peaks

| #  | a       | a <sup>++</sup> | a <sup>*</sup> | a <sup>*++</sup> | b             | b <sup>++</sup> | b <sup>*</sup> | b <sup>*++</sup> | Seq. | y              | y <sup>++</sup> | y <sup>*</sup> | y <sup>*++</sup> | #  |
|----|---------|-----------------|----------------|------------------|---------------|-----------------|----------------|------------------|------|----------------|-----------------|----------------|------------------|----|
| 1  | 74.06   | 37.53           |                |                  | 102.05        | 51.53           |                |                  | T    |                |                 |                |                  | 17 |
| 2  | 189.09  | 95.05           |                |                  | <b>217.08</b> | 109.04          |                |                  | D    | 1769.73        | 885.37          | 1752.70        | 876.85           | 16 |
| 3  | 432.12  | 216.56          |                |                  | <b>460.11</b> | 230.56          |                |                  | Y    | 1654.70        | 827.85          | 1637.67        | 819.34           | 15 |
| 4  | 546.16  | 273.58          | <b>529.13</b>  | 265.07           | <b>574.15</b> | 287.58          | 557.13         | 279.07           | N    | <b>1411.67</b> | 706.34          | 1394.64        | 697.82           | 14 |
| 5  | 617.20  | 309.10          | 600.17         | 300.59           | <b>645.19</b> | 323.10          | <b>628.17</b>  | 314.59           | A    | <b>1297.63</b> | 649.32          | 1280.60        | 640.80           | 13 |
| 6  | 704.23  | 352.62          | 687.20         | 344.10           | 732.22        | 366.62          | 715.20         | <b>358.10</b>    | S    | <b>1226.59</b> | 613.80          | 1209.56        | 605.28           | 12 |
| 7  | 803.30  | 402.15          | 786.27         | 393.64           | 831.29        | 416.15          | <b>814.27</b>  | 407.64           | V    | <b>1139.56</b> | 570.28          | 1122.53        | 561.77           | 11 |
| 8  | 890.33  | 445.67          | 873.30         | 437.15           | 918.32        | 459.67          | 901.30         | 451.15           | S    | <b>1040.49</b> | 520.75          | 1023.46        | 512.23           | 10 |
| 9  | 989.40  | 495.20          | 972.37         | 486.69           | 1017.39       | 509.20          | 1000.37        | 500.69           | V    | <b>953.46</b>  | 477.23          | 936.43         | 468.72           | 9  |
| 10 | 1086.45 | 543.73          | 1069.42        | 535.22           | 1114.45       | 557.73          | 1097.42        | 549.21           | P    | <b>854.39</b>  | 427.70          | 837.36         | 419.18           | 8  |

|           |         |        |         |        |         |        |         |        |          |               |        |        |        |          |
|-----------|---------|--------|---------|--------|---------|--------|---------|--------|----------|---------------|--------|--------|--------|----------|
| <b>11</b> | 1201.48 | 601.24 | 1184.45 | 592.73 | 1229.47 | 615.24 | 1212.45 | 606.73 | <b>D</b> | 757.34        | 379.17 | 740.31 | 370.66 | <b>7</b> |
| <b>12</b> | 1288.51 | 644.76 | 1271.48 | 636.25 | 1316.50 | 658.76 | 1299.48 | 650.24 | <b>S</b> | <b>642.31</b> | 321.66 | 625.28 | 313.14 | <b>6</b> |
| <b>13</b> | 1375.54 | 688.27 | 1358.51 | 679.76 | 1403.54 | 702.27 | 1386.51 | 693.76 | <b>S</b> | 555.28        | 278.14 | 538.25 | 269.63 | <b>5</b> |
| <b>14</b> | 1432.56 | 716.79 | 1415.54 | 708.27 | 1460.56 | 730.78 | 1443.53 | 722.27 | <b>G</b> | 468.24        | 234.63 | 451.22 | 226.11 | <b>4</b> |
| <b>15</b> | 1529.62 | 765.31 | 1512.59 | 756.80 | 1557.61 | 779.31 | 1540.58 | 770.80 | <b>P</b> | 411.22        | 206.11 | 394.20 | 197.60 | <b>3</b> |
| <b>16</b> | 1658.66 | 829.83 | 1641.63 | 821.32 | 1686.65 | 843.83 | 1669.63 | 835.32 | <b>E</b> | 314.17        | 157.59 | 297.14 | 149.08 | <b>2</b> |
| <b>17</b> |         |        |         |        |         |        |         |        | <b>R</b> | <b>185.13</b> | 93.07  | 168.10 | 84.55  | <b>1</b> |

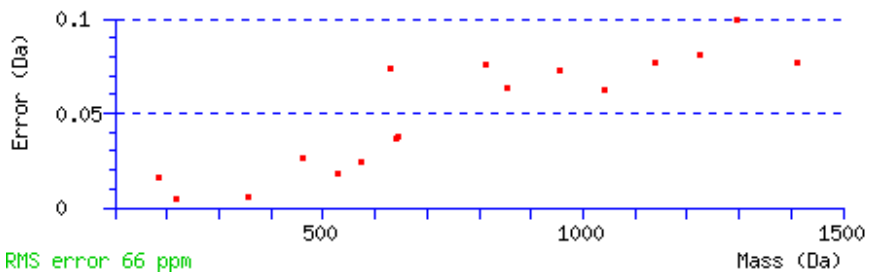

NCBI **BLAST** search of [TDYNASVSVPDSSGPER](#)
